# Supplementary material
Source: Copernicus journal article supplement (doi:10.5194/egusphere-2026-3308)
Supplement: Supplementary file 1 [file egusphere-2026-3308-supplement.pdf]

# Supplement of Characterizing Lightning $\text{NO}_x$ Production in the Ebro Valley with MTG-LI and LMA Observations

Francisco J. Pérez-Invernón<sup>1</sup>, Francisco J. Gordillo-Vázquez<sup>1</sup>, Oscar van der Velde<sup>2</sup>, Joan Montanyà<sup>2</sup>, Jesús Alberto López Trujillo<sup>2</sup>, Nicolau Pineda<sup>3</sup>, Diego Loyola<sup>4</sup>, Sora Seo<sup>4</sup>, Christoph Knote<sup>5</sup>, Alexandre O. Fierro<sup>6</sup>, and Heidi Huntrieser<sup>7</sup>

<sup>1</sup>Instituto de Astrofísica de Andalucía (IAA), CSIC, PO Box 3004, 18080 Granada, Spain

<sup>2</sup>Lightning Research Group, Polytechnic University of Catalonia, Terrassa, Spain

<sup>3</sup>Meteorological Service of Catalonia

<sup>4</sup>Deutsches Zentrum für Luft- und Raumfahrt, Methodik der Fernerkundung, Wessling, Germany

<sup>5</sup>Chair of Model-Based Environmental Exposure Science, Faculty of Medicine, University of Augsburg, Augsburg, Germany

<sup>6</sup>Metocean Team, I&E Engineering, BP Exploration and Operating Company, Ltd., Sunbury, UK.

<sup>7</sup>Deutsches Zentrum für Luft- und Raumfahrt, Institut für Physik der Atmosphäre, Oberpfaffenhofen, Germany

**Correspondence:** Francisco J. Pérez-Invernón (fjpi@iaa.es)

## 1 Introduction

The candidate dates selected for analysis are presented in Table S1. Table S2 shows the basic measurements for each analyzed date.

Figures S1 to S51 show the analysis of simulation results, TROP-DLR products, lightning measurements and calculated  $V_{tropNO_x}$  of the cases not shown in the main part of the manuscript.

Figure S52 shows pixel-based  $V_{tropLNO_x}$  versus average lightning characteristics computed across all pixels included in the 18 analyzed dates. The included linear fittings and binned data indicates positive relationships between the  $V_{tropLNO_x}$  and the analyzed lightning characteristics. Figures S53 and S54 are equivalent to Figures 5 and 6 of the main manuscript, but using  $\tau = 3$  h instead of  $\tau = 5$  h. These figures show that there are not significant differences in the obtained correlations between the  $LNO_x$  PE and the main lightning characteristics when using a different value for  $\tau$ . In fact, the majority of the positive correlations are stronger when using  $\tau = 3$  h.

Figure S55 shows the analysis of the influence of the background- $\text{NO}_x$  estimate in the obtained relationships.

## 2 Tables

| Date       | Flashes | Selected | Main reason for non-selection                                                | Selected ROI                |
|------------|---------|----------|------------------------------------------------------------------------------|-----------------------------|
| 2024-07-06 | 5752    | Yes      | -                                                                            | 42.0°N-42.9°N, 0.0°E-3.5°E  |
| 2024-07-21 | 13359   | Yes      | -                                                                            | 42.0°N-42.9°N, 0.0°E-4.5°E  |
| 2024-08-02 | 3870    | Yes      | -                                                                            | 39.7°N-41.6°N, 2°W-1.5°E    |
| 2024-08-13 | 11058   | Yes      | -                                                                            | 42.75°N-42.5°N, 0.0°E-3.5°E |
| 2024-08-14 | 39078   | Yes      | -                                                                            | 41.5°N-42.5°N, 2.0°E-3.5°E  |
| 2024-08-22 | 2144    | No       | Only 479 flashes within the LMA area                                         | -                           |
| 2024-08-23 | 2729    | Yes      | -                                                                            | 39.5°N-41.0°N, 3.5°W-0.0°E  |
| 2024-08-25 | 1068    | Yes      | -                                                                            | 40.0°N-42.0°N, 3.5°W-0.5°E  |
| 2024-09-01 | 1004    | No       | Activity centered out of the LMA area (Northwest)                            | -                           |
| 2024-09-02 | 7404    | Yes      | -                                                                            | 40.0°N-41.5°N, 2.5°W- 0.5°W |
| 2024-09-03 | 45558   | Yes      | -                                                                            | 39.5°N-42.9°N, -1.2°W-3.5°E |
| 2024-09-04 | 28700   | No       | Activity centered out of the LMA area (Southeast Balearic Sea)               | -                           |
| 2024-09-06 | 3312    | No       | Activity centered out of the LMA area (Northwest)                            | -                           |
| 2024-09-21 | 2970    | Yes      | -                                                                            | 40.5°N-42.9°N, 2.5°W- 0.3°W |
| 2024-09-22 | 825     | No       | Activity centered out of the LMA area (Northwest and Southeast Balearic Sea) | -                           |
| 2024-09-23 | 7503    | No       | Age larger than 3.5 hours                                                    | -                           |
| 2024-09-24 | 11088   | No       | Activity centered out of the LMA area (Southeast Balearic Sea)               | -                           |
| 2024-10-15 | 5416    | Yes      | -                                                                            | 39.7°N-41.5°N, 1.5°W-0.0°E  |
| 2024-10-17 | 12665   | No       | The LNOx advected outside the LMA area                                       | -                           |
| 2024-10-26 | 7194    | No       | Activity centered out of the LMA area (Southeast Balearic Sea)               | -                           |
| 2024-10-29 | 5459    | No       | Activity centered out of the LMA area (Southwest)                            | -                           |
| 2024-10-30 | 9020    | No       | Activity centered out of the LMA area (Northwest)                            | -                           |
| 2024-10-31 | 5139    | Yes      | -                                                                            | 40.0°N-42.0°N, 1.5°W-2.0°E  |
| 2024-11-01 | 4507    | Yes      | -                                                                            | 39.9°N-41.5°N, 0.5°W-4.5°E  |
| 2024-11-04 | 2396    | No       | Age larger than 3.5 hours                                                    | -                           |
| 2024-11-12 | 739     | No       | Activity centered out of the LMA area (Southeast Balearic Sea)               | -                           |
| 2024-11-13 | 2603    | Yes      | -                                                                            | 39.0°N-41.5°N, 1.3°W-3.2°E  |
| 2025-04-14 | 3946    | No       | Activity centered out of the LMA area (Southwest)                            | -                           |
| 2025-04-15 | 1556    | Yes      | -                                                                            | 41.5°N-42.9°N, 1.0°E-4.0°E  |
| 2025-04-19 | 5592    | Yes      | -                                                                            | 39.5°N-42.9°N, 1.5°W-2.5°E  |
| 2025-04-22 | 950     | No       | Only 531 flashes within the LMA area                                         | -                           |
| 2025-04-26 | 1436    | Yes      | -                                                                            | 41.7°N-42.9°N, 0.0°E-3.2°   |
| 2025-05-02 | 5823    | No       | Activity centered out of the LMA area (West)                                 | -                           |
| 2025-05-03 | 1199    | No       | Activity centered out of the LMA area (North and South)                      | -                           |
| 2025-05-04 | 3753    | Yes      | -                                                                            | 40.5°N-42.0°N, 1.0°W-1.5°E  |

**Table S1.** Date candidates with at least 650 flashes reported by MTG-LI between 7:00 and 14:00 within 39.5°N and 42.9°N latitude, and -1.5°W and 4.5°E longitude. Reasons for non-selection, where applicable, are included. The selected Region of Interest (ROI) is indicated.

| Date       | Orbit | Flashes (MTG-LI) | Flashes (LMA) | CG Flashes (LLS-SMC) | Age MTG-LI (h) | Age LMA (h) | OCP (hPa) | Valid pixels | Pixels with MTG-LI flash | Pixels with LMA flash |
|------------|-------|------------------|---------------|----------------------|----------------|-------------|-----------|--------------|--------------------------|-----------------------|
| 2024-07-06 | 34875 | 803              | 1917          | 184                  | 0.72           | 0.49        | 425.02    | 154          | 23                       | 33                    |
| 2024-07-21 | 35087 | 11250            | 26583         | 2062                 | 3.38           | 3.45        | 469.21    | 331          | 153                      | 149                   |
| 2024-08-02 | 35258 | 1736             | 11313         | 186                  | 0.63           | 0.61        | 337.04    | 260          | 94                       | 102                   |
| 2024-08-13 | 35414 | 6653             | 20296         | 995                  | 1.52           | 1.50        | 365.64    | 573          | 219                      | 237                   |
| 2024-08-14 | 35428 | 845              | 2170          | 110                  | 0.33           | 0.32        | 385.97    | 80           | 45                       | 36                    |
| 2024-08-23 | 35555 | 676              | 1823          | 65                   | 0.68           | 0.73        | 369.89    | 154          | 36                       | 42                    |
| 2024-08-25 | 35584 | 752              | 4100          | 24                   | 1.82           | 1.18        | 323.07    | 366          | 85                       | 96                    |
| 2024-09-02 | 35697 | 2885             | 3896          | 55                   | 0.65           | 0.55        | 369.79    | 174          | 80                       | 65                    |
| 2024-09-03 | 35711 | 25929            | 56203         | 7622                 | 1.54           | 1.41        | 375.85    | 1614         | 675                      | 711                   |
| 2024-09-21 | 35967 | 2560             | 4066          | 190                  | 1.08           | 1.01        | 434.87    | 657          | 136                      | 128                   |
| 2024-10-15 | 36307 | 1400             | 2854          | 157                  | 0.95           | 0.78        | 412.91    | 284          | 35                       | 31                    |
| 2024-10-31 | 36534 | 2787             | 7250          | 1446                 | 2.30           | 2.21        | 341.87    | 637          | 233                      | 322                   |
| 2024-11-01 | 36549 | 1959             | 2997          | 1166                 | 2.24           | 2.58        | 385.81    | 372          | 190                      | 226                   |
| 2024-11-13 | 36719 | 1682             | 2199          | 261                  | 2.09           | 2.14        | 434.51    | 1109         | 101                      | 114                   |
| 2025-04-15 | 38890 | 1086             | 1628          | 162                  | 1.21           | 1.27        | 453.89    | 256          | 43                       | 38                    |
| 2025-04-19 | 38946 | 4906             | 7979          | 1905                 | 1.69           | 1.62        | 493.99    | 340          | 146                      | 159                   |
| 2025-04-26 | 39046 | 1318             | 1699          | 377                  | 1.65           | 1.65        | 499.34    | 89           | 31                       | 34                    |
| 2025-05-04 | 39159 | 1439             | 3688          | 153                  | 0.68           | 0.69        | 384.22    | 509          | 79                       | 59                    |

**Table S2.** Analyzed dates, orbits, total number flashes detected by MTG-LI, LMA and CG flashes detected by LSS-SMC up to 5 h before the overpass of TROPOMI, average flash age according to MTG-LI and LMA, average OCP in TROPOMI pixels satisfying the DCC, total number of valid TROPOMI pixels satisfying the DCC, and total number of TROPOMI pixels with MTG-LI or LMA flashes satisfying the DCC.

### 3 Figures

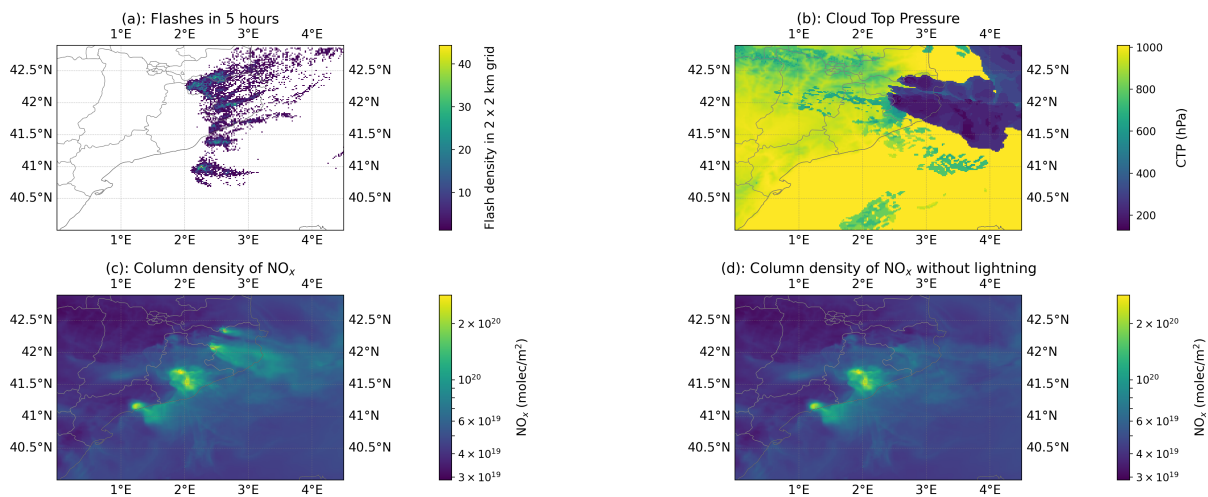

**Figure S1.** Simulation results for 21 July 2024 at 12:30 UTC, focused on the region of interest. (a): Assimilated lightning flashes between 07:30 and 12:30 UTC reported by MTG-LI. (b): Cloud Top Pressure (CTP). (c): Vertical Column Density of NO<sub>x</sub>. (d): Vertical column density of NO<sub>x</sub> in the simulation without fresh LNO<sub>x</sub>, i.e., with LNO<sub>x</sub> deactivated after 07:00 UTC.

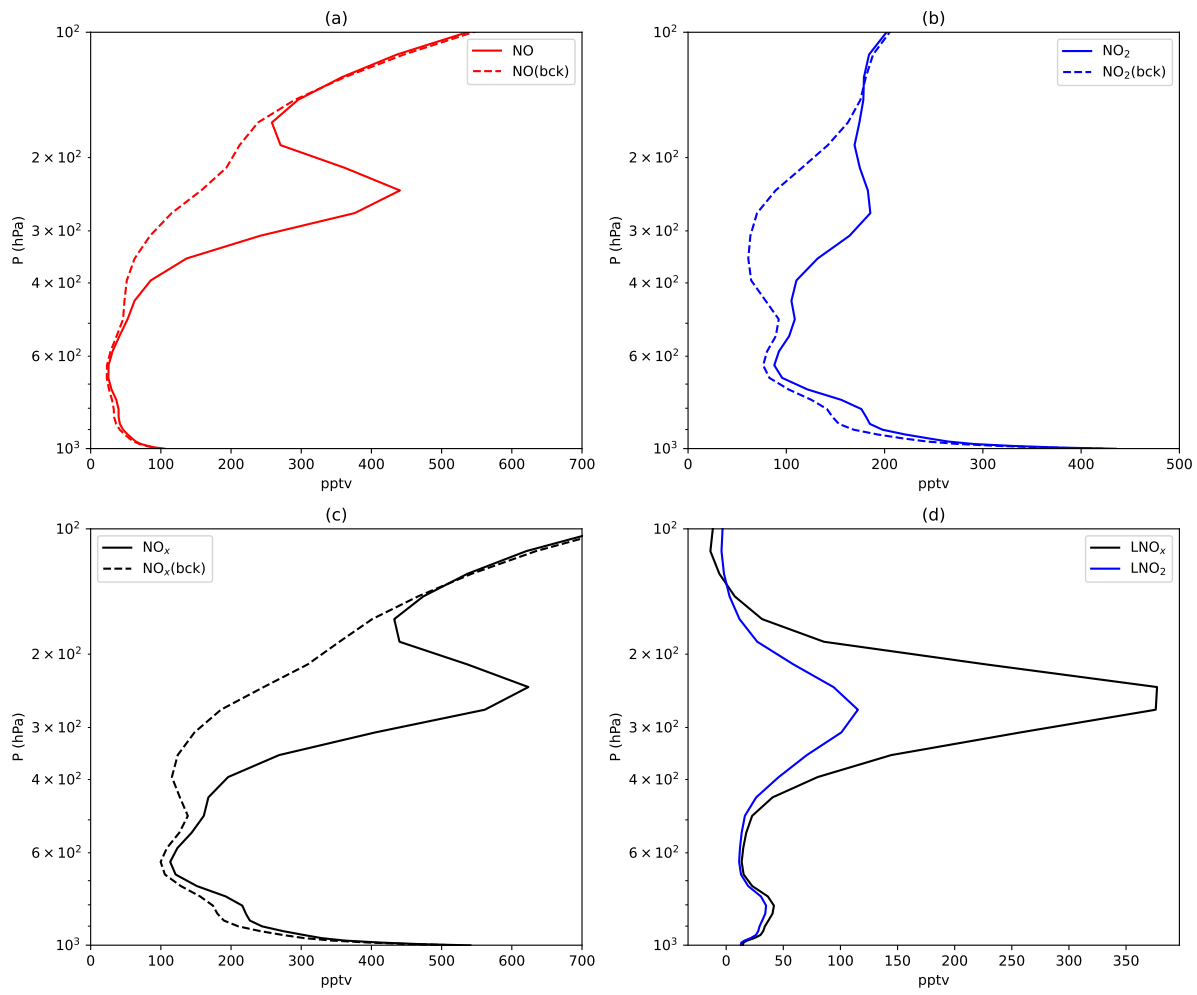

**Figure S2.** Vertical mixing ratio profiles of NO (a), NO<sub>2</sub> (b), NO<sub>x</sub> (c), LNO<sub>x</sub> and LNO<sub>2</sub> (d) extracted from WRF-CHEM simulations with (solid lines) and without (dashed lines) fresh LNO<sub>x</sub> on 21 July 2024 at 12:30 UTC (close to the TROPOMI overpass (background: bck)).

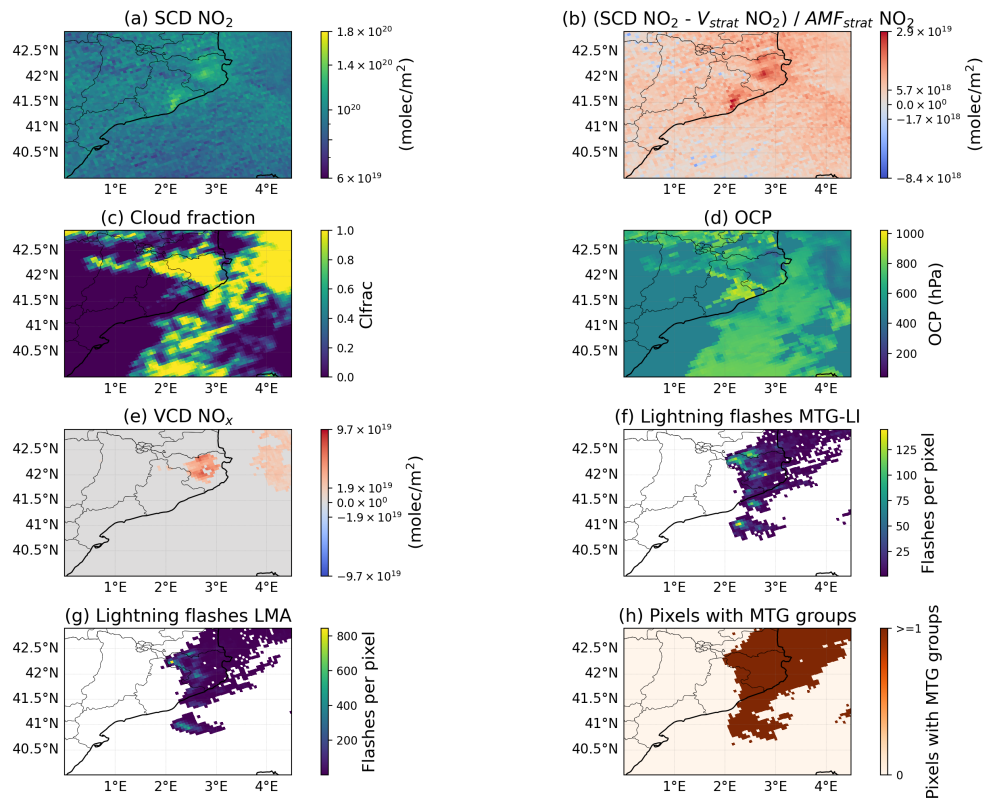

**Figure S3.** TROP-DLR product of orbit 35087, MTG-LI and LMA lightning data for the case 21 July 2024. (a): Slant Column Density (SCD) of NO<sub>2</sub> provided by the TROP-DLR NO<sub>2</sub> research product. (b): SCD NO<sub>2</sub> minus the stratospheric vertical column density and divided to the stratospheric air mass factor of NO<sub>2</sub> obtained from the TROP-DLR NO<sub>2</sub> research product. (c) and (d): Cloud Fraction (CF) and Optical Centroid Pressure (OCP) from the TROP-DLR NO<sub>2</sub> research product, respectively. (e): VCD of NO<sub>x</sub> ( $V_{tropNOx}$ ) over pixels satisfying the DCC. (f) and (g): Lightning flashes during the 5 h period per TROPOMI pixel before the TROPOMI overpass reported by MTG-LI and the LMA, respectively. (h): TROPOMI pixels containing at least one lightning group detected by MTG-LI.

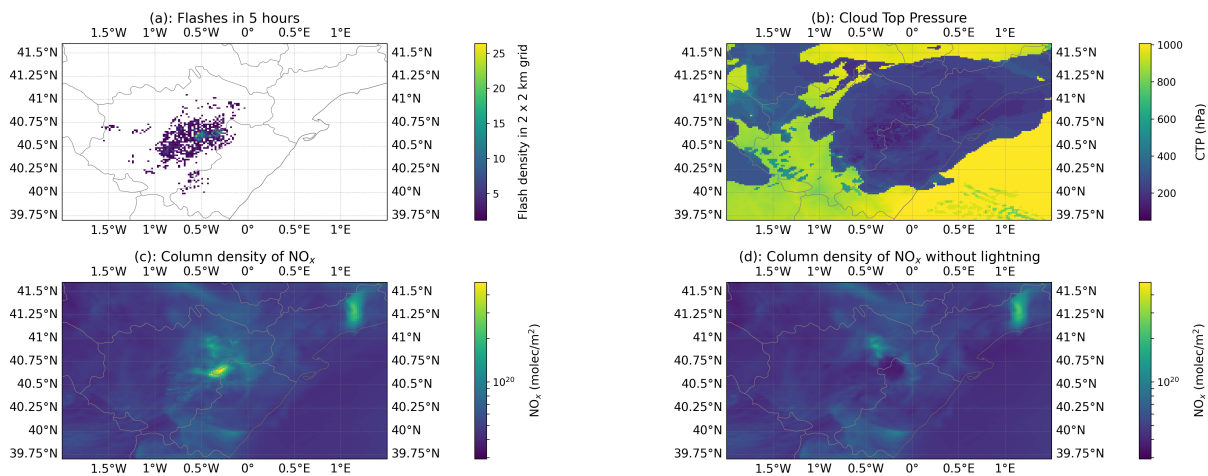

**Figure S4.** Simulation results for 2 August 2024 at 13:50 UTC, focused on the region of interest. (a): Assimilated lightning flashes between 08:50 and 13:50 UTC reported by MTG-LI. (b): Cloud Top Pressure (CTP). (c): Vertical Column Density of NO<sub>x</sub>. (d): Vertical column density of NO<sub>x</sub> in the simulation without fresh LNO<sub>x</sub>, i.e., with LNO<sub>x</sub> deactivated after 07:00 UTC.

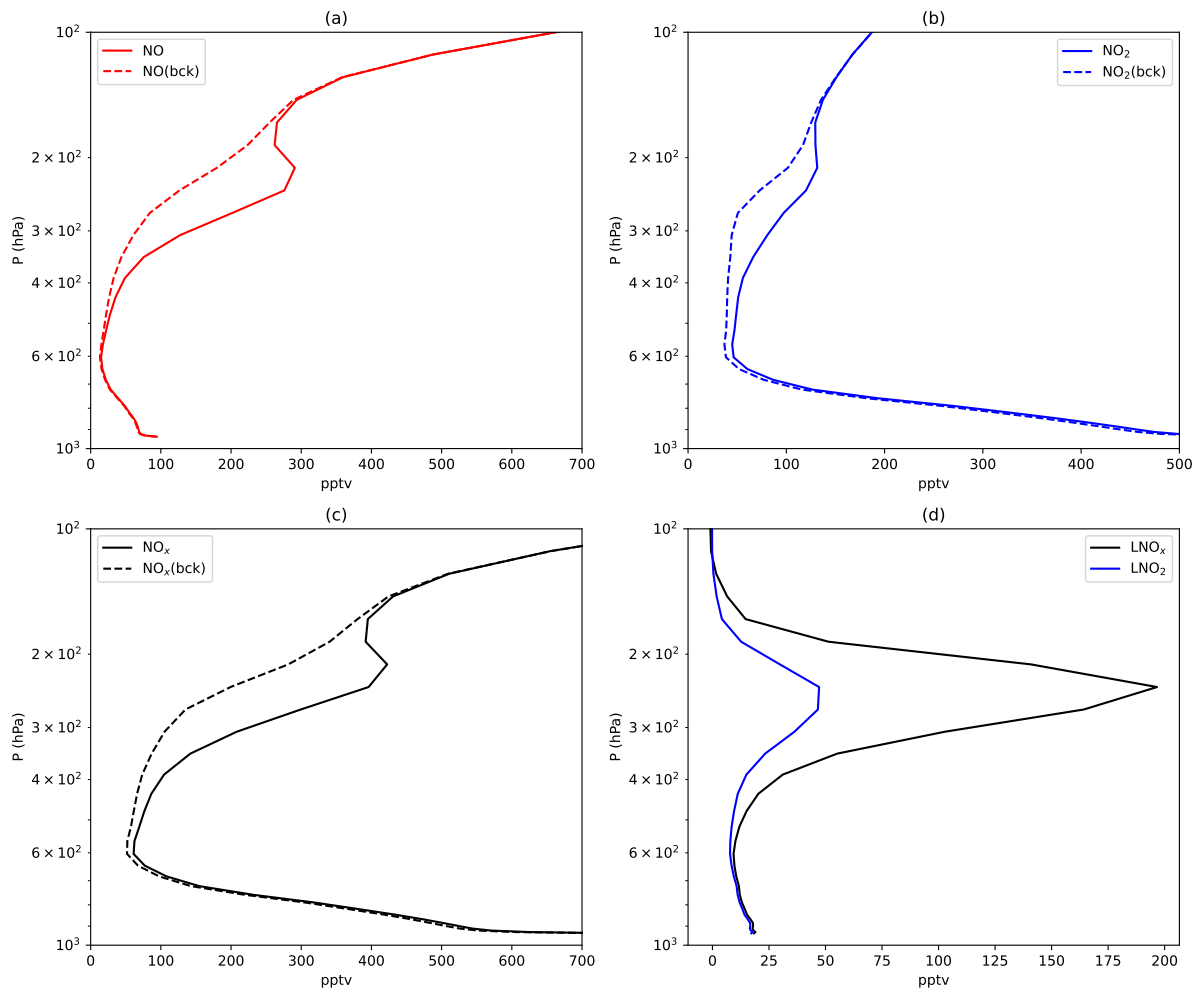

**Figure S5.** Vertical mixing ratio profiles of NO (a), NO<sub>2</sub> (b), NO<sub>x</sub> (c), LNO<sub>x</sub> and LNO<sub>2</sub> (d) extracted from WRF-CHEM simulations with (solid lines) and without (dashed lines) fresh LNO<sub>x</sub> on 2 August 2024 at 13:50 UTC (close to the TROPOMI overpass (background: bck)).

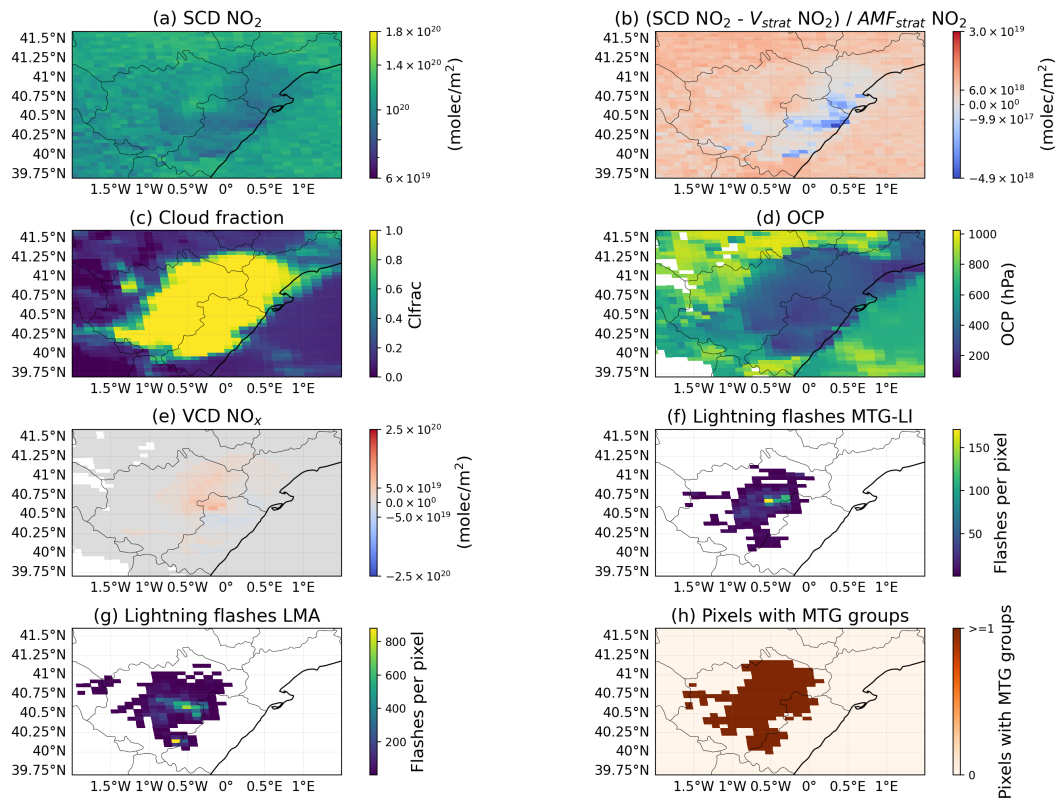

**Figure S6.** TROP-DLR product of orbit 35258, MTG-LI and LMA lightning data for the case 2 August 2024. (a): Slant Column Density (SCD) of  $\text{NO}_2$  provided by the TROP-DLR  $\text{NO}_2$  research product. (b): SCD  $\text{NO}_2$  minus the stratospheric vertical column density and divided to the stratospheric air mass factor of  $\text{NO}_2$  obtained from the TROP-DLR  $\text{NO}_2$  research product. (c) and (d): Cloud Fraction (CF) and Optical Centroid Pressure (OCP) from the TROP-DLR  $\text{NO}_2$  research product, respectively. (e): VCD of  $\text{NO}_x$  ( $V_{\text{TROPNO}_x}$ ) over pixels satisfying the DCC. (f) and (g): Lightning flashes during the 5 h period per TROPOMI pixel before the TROPOMI overpass reported by MTG-LI and the LMA, respectively. (h): TROPOMI pixels containing at least one lightning group detected by MTG-LI.

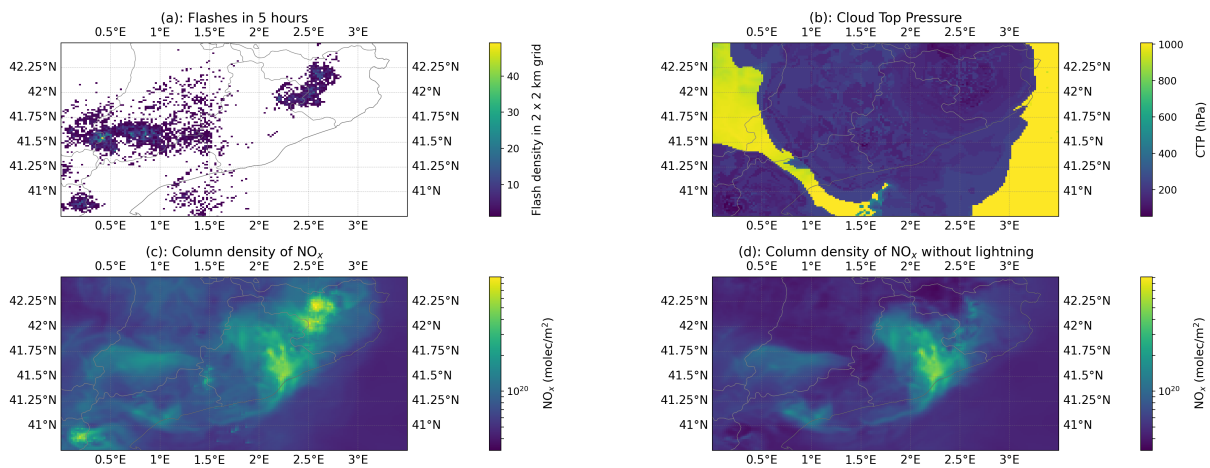

**Figure S7.** Simulation results for 13 August 2024 at 13:40 UTC, focused on the region of interest. (a): Assimilated lightning flashes between 08:40 and 13:40 UTC reported by MTG-LI. (b): Cloud Top Pressure (CTP). (c): Vertical Column Density of  $\text{NO}_x$ . (d): Vertical column density of  $\text{NO}_x$  in the simulation without fresh LNO<sub>x</sub>, i.e., with LNO<sub>x</sub> deactivated after 07:00 UTC.

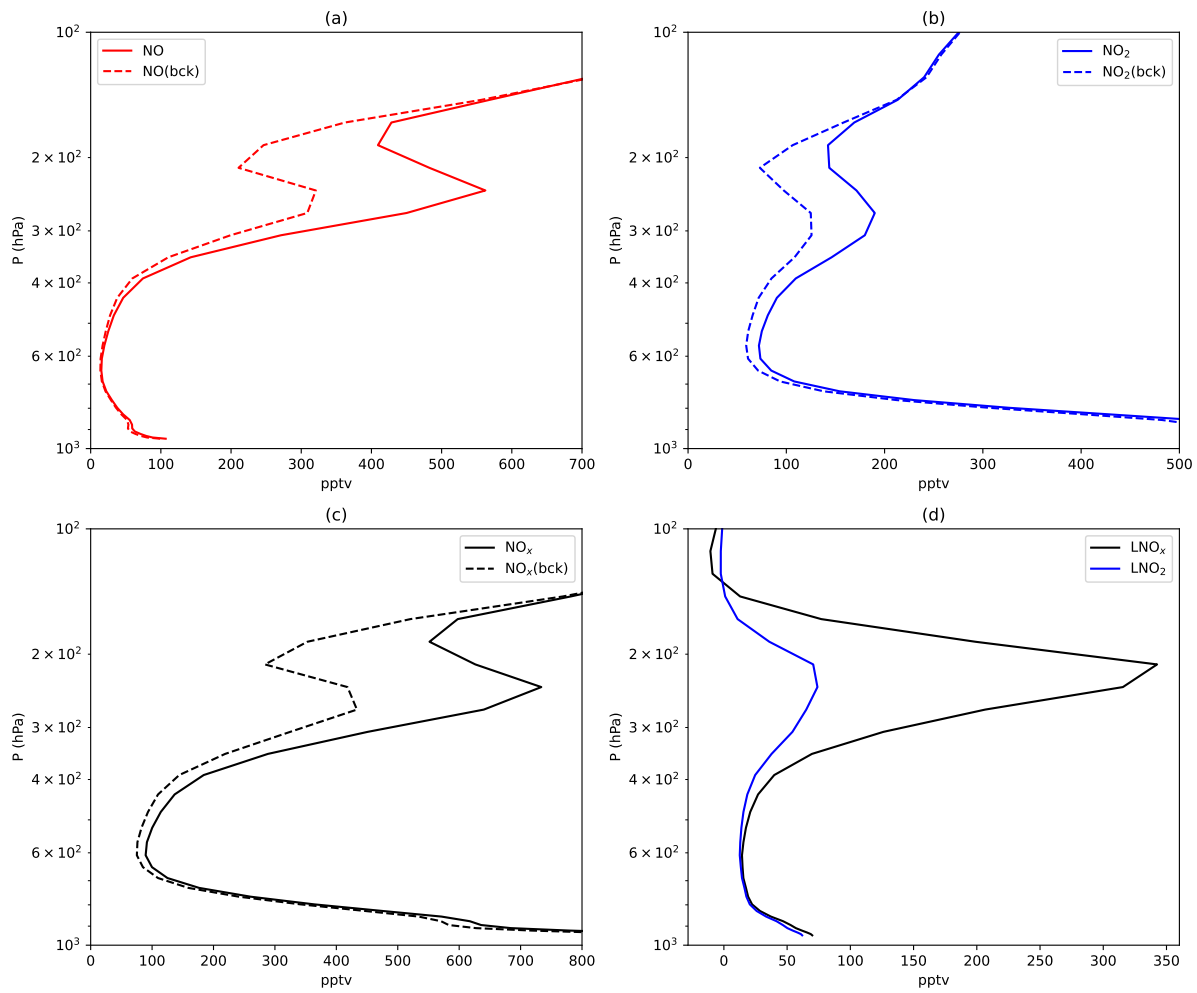

**Figure S8.** Vertical mixing ratio profiles of NO (a), NO<sub>2</sub> (b), NO<sub>x</sub> (c), LNO<sub>x</sub> and LNO<sub>2</sub> (d) extracted from WRF-CHEM simulations with (solid lines) and without (dashed lines) fresh LNO<sub>x</sub> on 13 August 2024 at 13:40 UTC (close to the TROPOMI overpass (background: bck)).

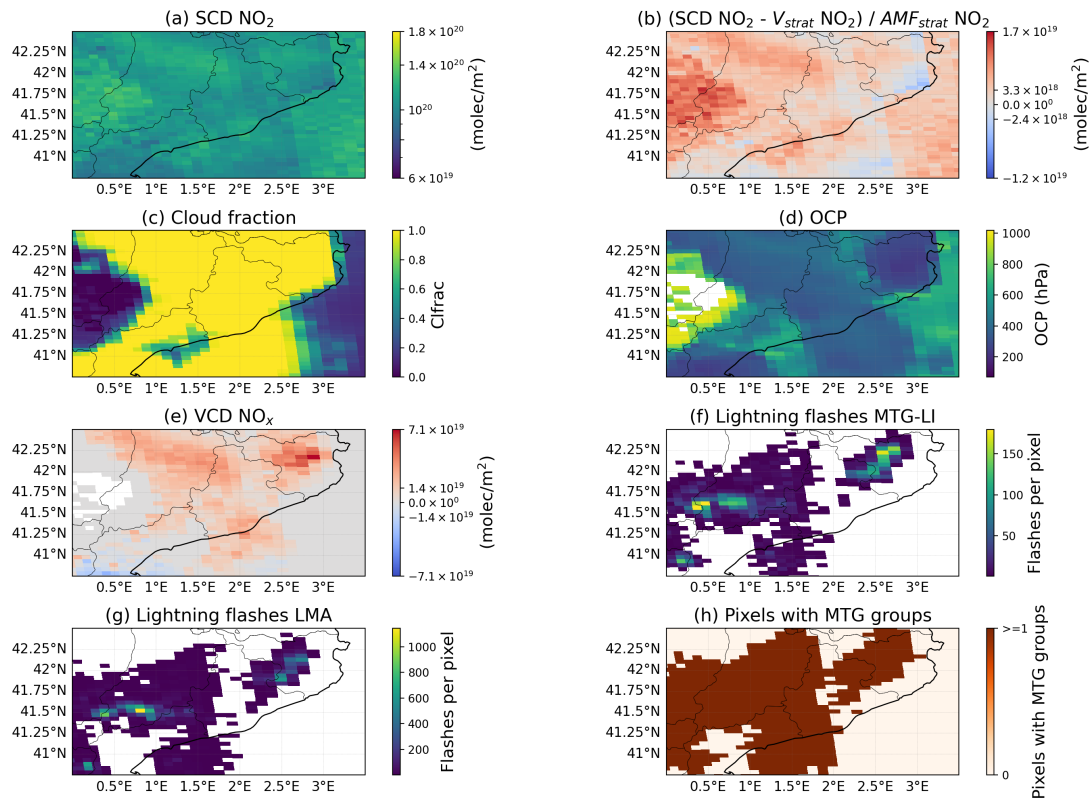

**Figure S9.** TROP-DLR product of orbit 35414, MTG-LI and LMA lightning data for the case 13 August 2024. (a): Slant Column Density (SCD) of  $\text{NO}_2$  provided by the TROP-DLR  $\text{NO}_2$  research product. (b): SCD  $\text{NO}_2$  minus the stratospheric vertical column density and divided to the stratospheric air mass factor of  $\text{NO}_2$  obtained from the TROP-DLR  $\text{NO}_2$  research product. (c) and (d): Cloud Fraction (CF) and Optical Centroid Pressure (OCP) from the TROP-DLR  $\text{NO}_2$  research product, respectively. (e): VCD of  $\text{NO}_x$  ( $V_{trop\text{NO}_x}$ ) over pixels satisfying the DCC. (f) and (g): Lightning flashes during the 5 h period per TROPOMI pixel before the TROPOMI overpass reported by MTG-LI and the LMA, respectively. (h): TROPOMI pixels containing at least one lightning group detected by MTG-LI.

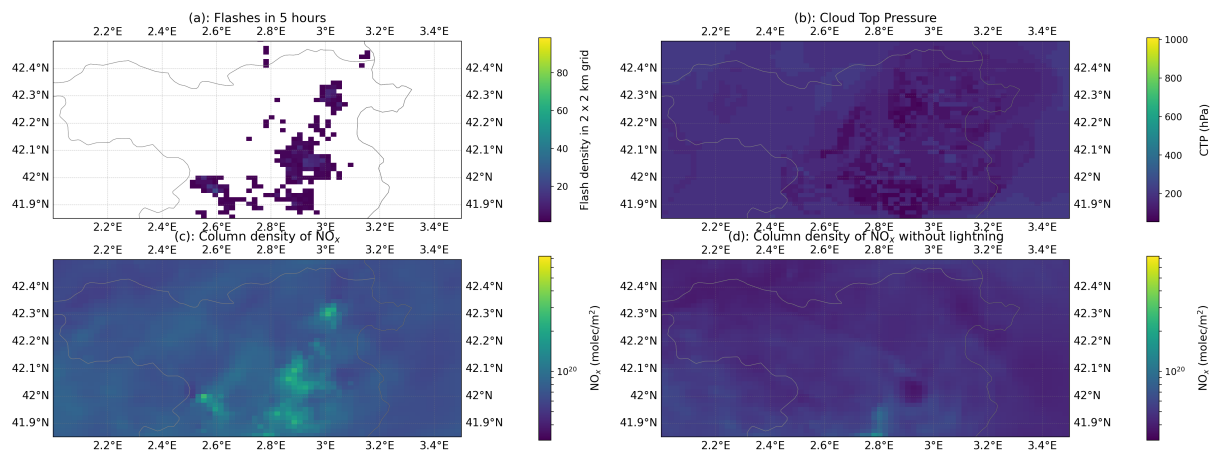

**Figure S10.** Simulation results for 14 August 2024 at 13:20 UTC, focused on the region of interest. (a): Assimilated lightning flashes between 08:20 and 13:20 UTC reported by MTG-LI. (b): Cloud Top Pressure (CTP). (c): Vertical Column Density of  $\text{NO}_x$ . (d): Vertical column density of  $\text{NO}_x$  in the simulation without fresh  $\text{LNO}_x$ , i.e., with  $\text{LNO}_x$  deactivated after 07:00 UTC.

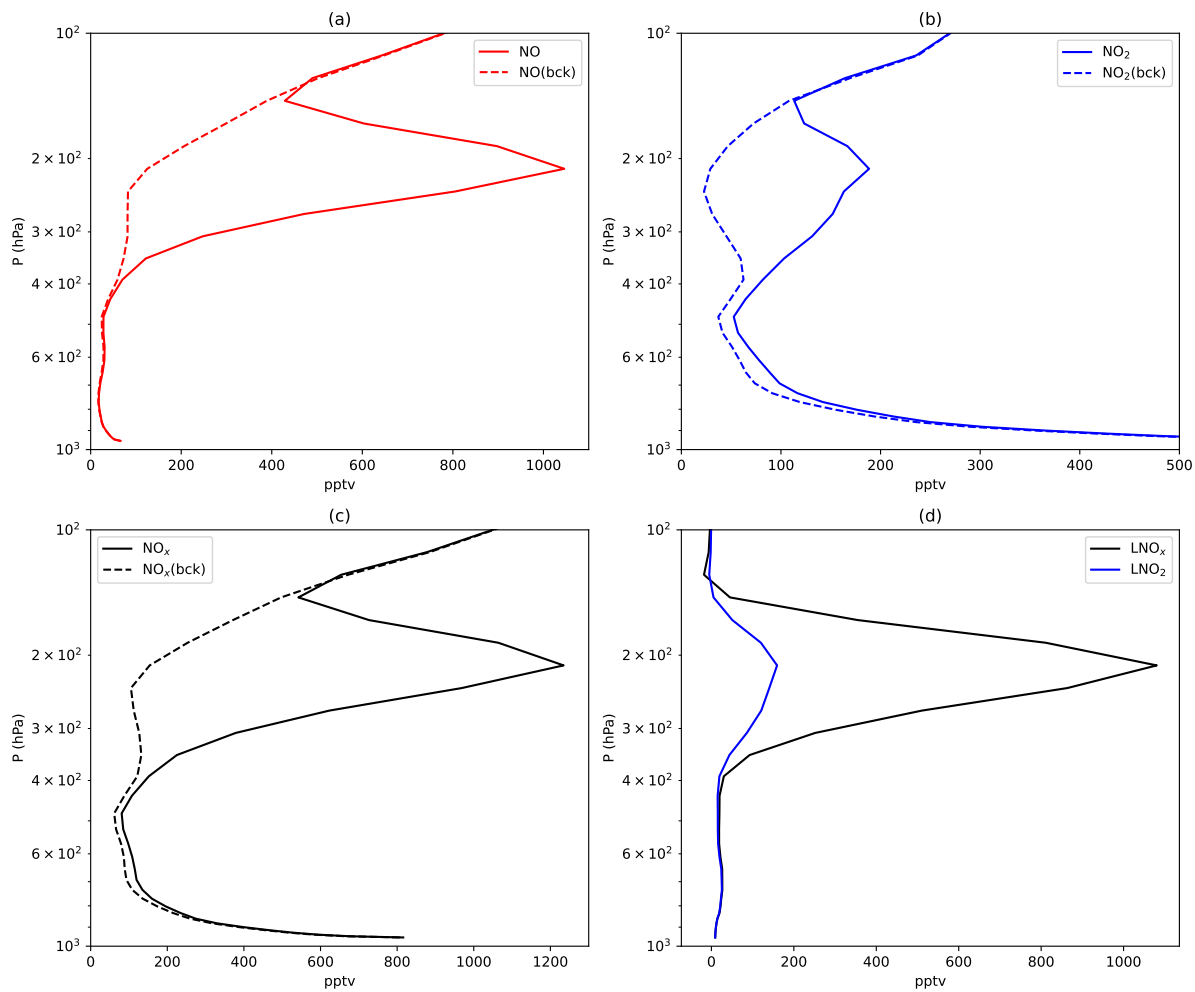

**Figure S11.** Vertical mixing ratio profiles of NO (a), NO<sub>2</sub> (b), NO<sub>x</sub> (c), LNO<sub>x</sub> and LNO<sub>2</sub> (d) extracted from WRF-CHEM simulations with (solid lines) and without (dashed lines) fresh LNO<sub>x</sub> on 14 August 2024 at 13:20 UTC (close to the TROPOMI overpass (background: bck)).

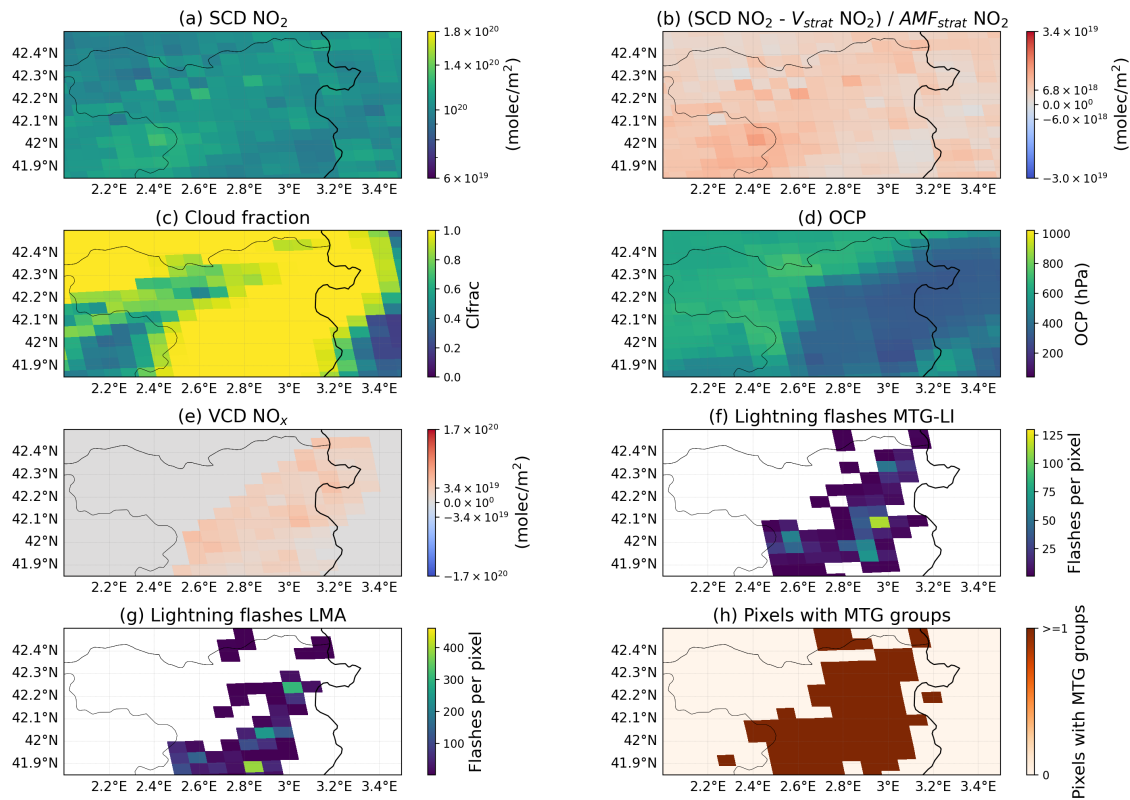

**Figure S12.** TROP-DLR product of orbit 35428, MTG-LI and LMA lightning data for the case 14 August 2024. (a): Slant Column Density (SCD) of NO<sub>2</sub> provided by the TROP-DLR NO<sub>2</sub> research product. (b): SCD NO<sub>2</sub> minus the stratospheric vertical column density and divided to the stratospheric air mass factor of NO<sub>2</sub> obtained from the TROP-DLR NO<sub>2</sub> research product. (c) and (d): Cloud Fraction (CF) and Optical Centroid Pressure (OCP) from the TROP-DLR NO<sub>2</sub> research product, respectively. (e): VCD of NO<sub>x</sub> ( $V_{tropNOx}$ ) over pixels satisfying the DCC. (f) and (g): Lightning flashes during the 5 h period per TROPOMI pixel before the TROPOMI overpass reported by MTG-LI and the LMA, respectively. (h): TROPOMI pixels containing at least one lightning group detected by MTG-LI.

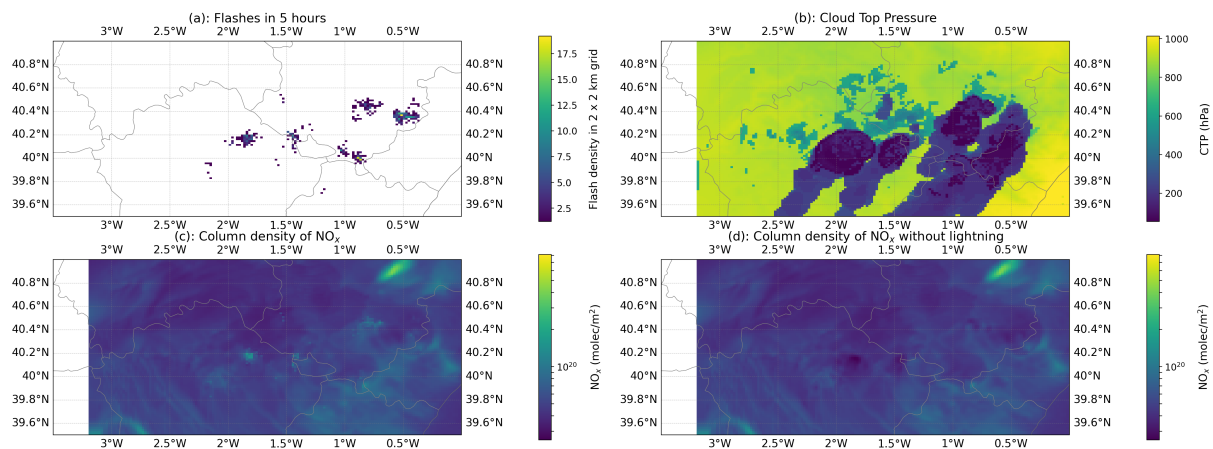

**Figure S13.** Simulation results for 23 August 2024 at 12:10 UTC, focused on the region of interest. (a): Assimilated lightning flashes between 07:10 and 12:10 UTC reported by MTG-LI. (b): Cloud Top Pressure (CTP). (c): Vertical Column Density of  $\text{NO}_x$ . (d): Vertical column density of  $\text{NO}_x$  in the simulation without fresh  $\text{LNO}_x$ , i.e., with  $\text{LNO}_x$  deactivated after 07:00 UTC.

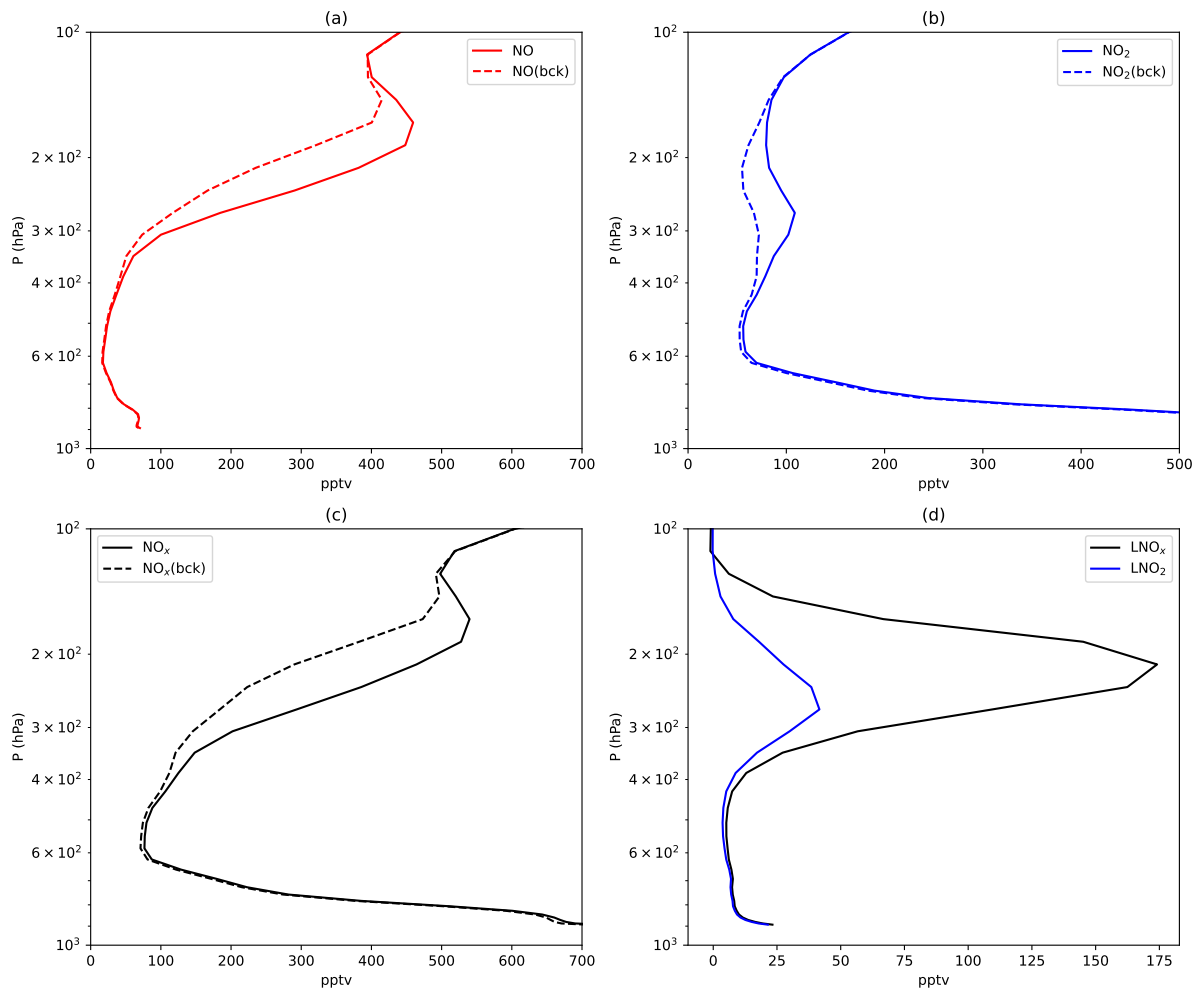

**Figure S14.** Vertical mixing ratio profiles of NO (a), NO<sub>2</sub> (b), NO<sub>x</sub> (c), LNO<sub>x</sub> and LNO<sub>2</sub> (d) extracted from WRF-CHEM simulations with (solid lines) and without (dashed lines) fresh LNO<sub>x</sub> on 23 August 2024 at 12:10 UTC (close to the TROPOMI overpass (background: bck)).

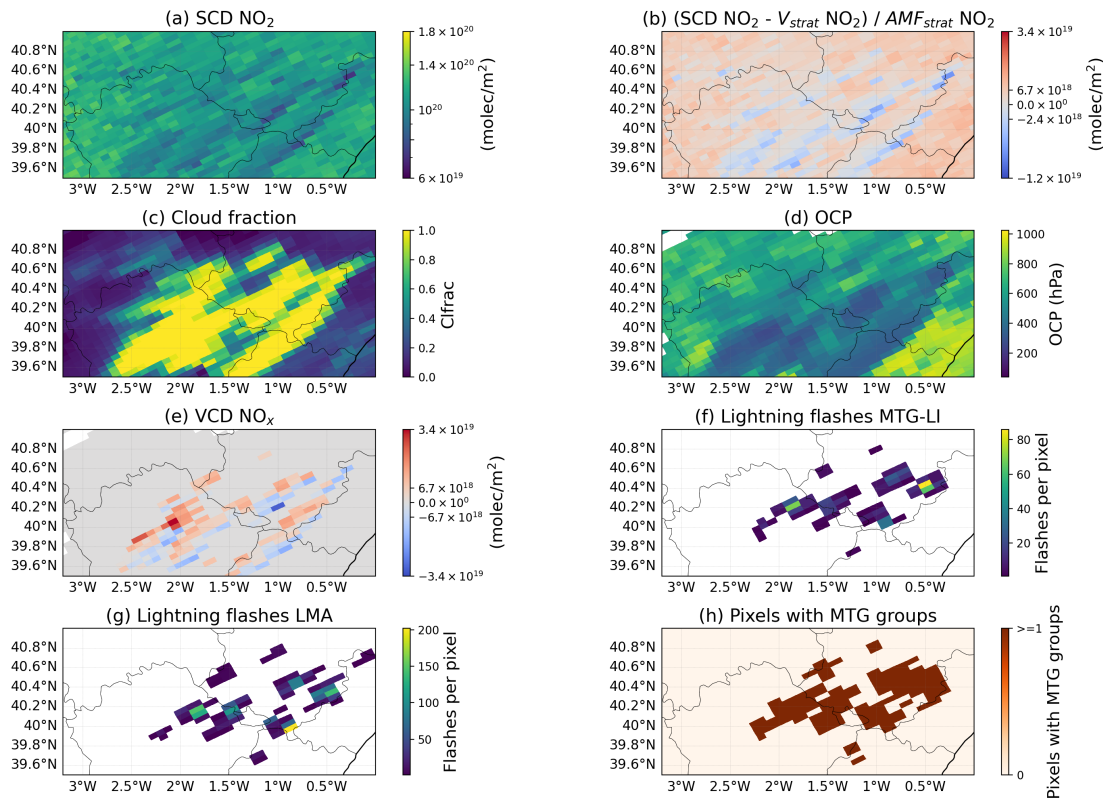

**Figure S15.** TROP-DLR product of orbit 35555, MTG-LI and LMA lightning data for the case 23 August 2024. (a): Slant Column Density (SCD) of NO<sub>2</sub> provided by the TROP-DLR NO<sub>2</sub> research product. (b): SCD NO<sub>2</sub> minus the stratospheric vertical column density and divided to the stratospheric air mass factor of NO<sub>2</sub> obtained from the TROP-DLR NO<sub>2</sub> research product. (c) and (d): Cloud Fraction (CF) and Optical Centroid Pressure (OCP) from the TROP-DLR NO<sub>2</sub> research product, respectively. (e): VCD of NO<sub>x</sub> ( $V_{tropNOx}$ ) over pixels satisfying the DCC. (f) and (g): Lightning flashes during the 5 h period per TROPOMI pixel before the TROPOMI overpass reported by MTG-LI and the LMA, respectively. (h): TROPOMI pixels containing at least one lightning group detected by MTG-LI.

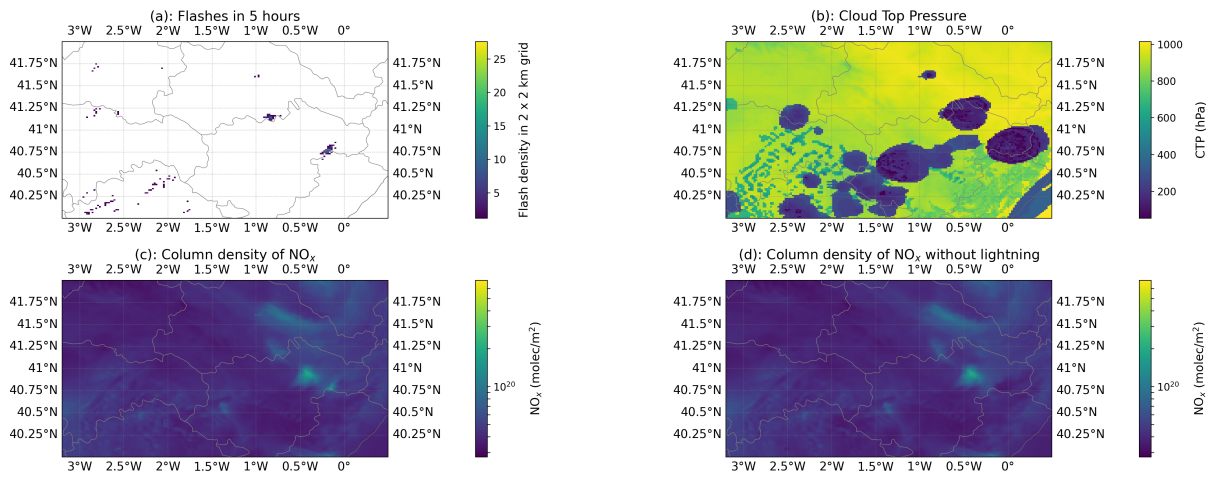

**Figure S16.** Simulation results for 25 August 2024 at 13:10 UTC, focused on the region of interest. (a): Assimilated lightning flashes between 08:10 and 13:10 UTC reported by MTG-LI. (b): Cloud Top Pressure (CTP). (c): Vertical Column Density of  $\text{NO}_x$ . (d): Vertical column density of  $\text{NO}_x$  in the simulation without fresh  $\text{LNO}_x$ , i.e., with  $\text{LNO}_x$  deactivated after 07:00 UTC.

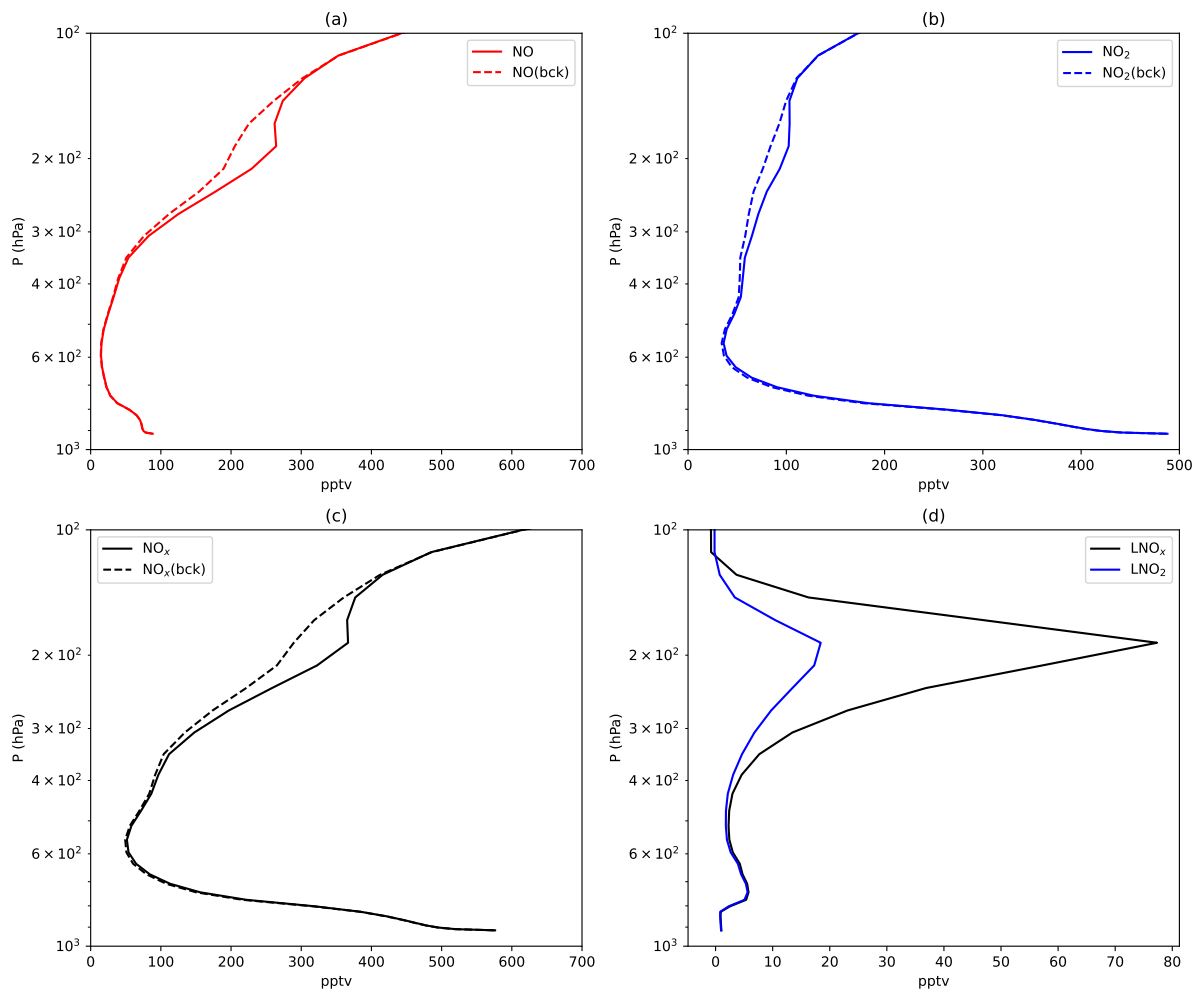

**Figure S17.** Vertical mixing ratio profiles of NO (a), NO<sub>2</sub> (b), NO<sub>x</sub> (c), LNO<sub>x</sub> and LNO<sub>2</sub> (d) extracted from WRF-CHEM simulations with (solid lines) and without (dashed lines) fresh LNO<sub>x</sub> on 25 August 2024 at 13:10 UTC (close to the TROPOMI overpass (background: bck)).

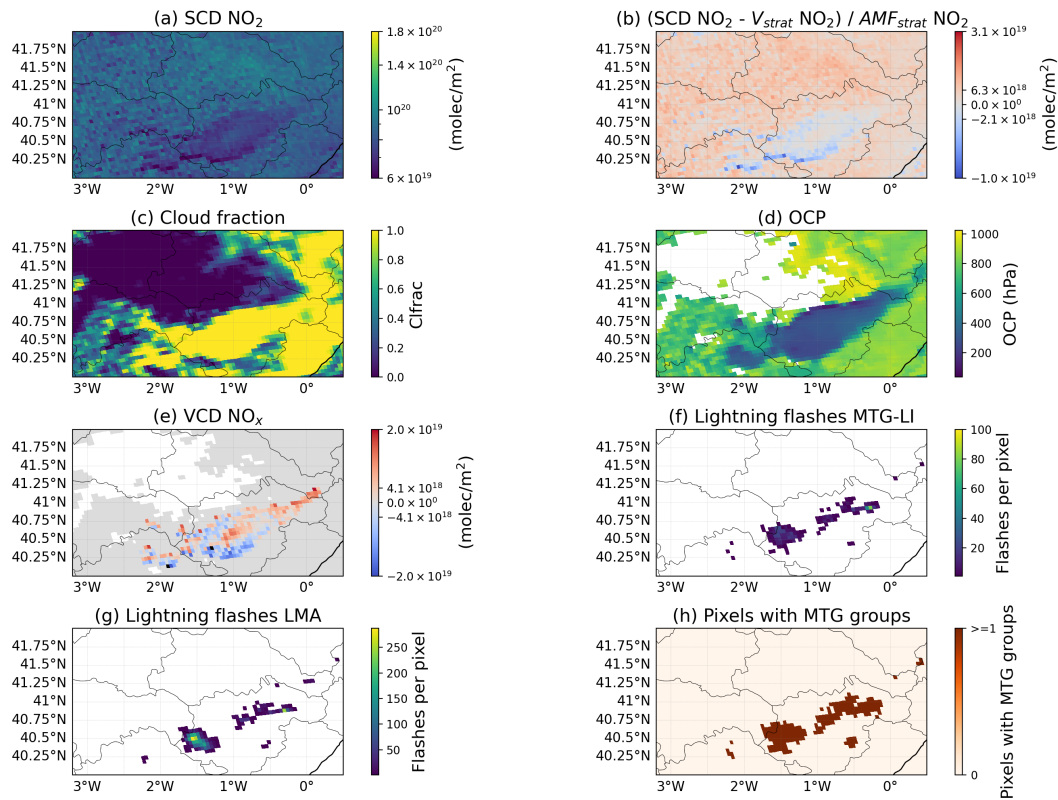

**Figure S18.** TROP-DLR product of orbit 35584, MTG-LI and LMA lightning data for the case 25 August 2024. (a): Slant Column Density (SCD) of NO<sub>2</sub> provided by the TROP-DLR NO<sub>2</sub> research product. (b): SCD NO<sub>2</sub> minus the stratospheric vertical column density and divided to the stratospheric air mass factor of NO<sub>2</sub> obtained from the TROP-DLR NO<sub>2</sub> research product. (c) and (d): Cloud Fraction (CF) and Optical Centroid Pressure (OCP) from the TROP-DLR NO<sub>2</sub> research product, respectively. (e): VCD of NO<sub>x</sub> ( $V_{tropNOx}$ ) over pixels satisfying the DCC. (f) and (g): Lightning flashes during the 5 h period per TROPOMI pixel before the TROPOMI overpass reported by MTG-LI and the LMA, respectively. (h): TROPOMI pixels containing at least one lightning group detected by MTG-LI.

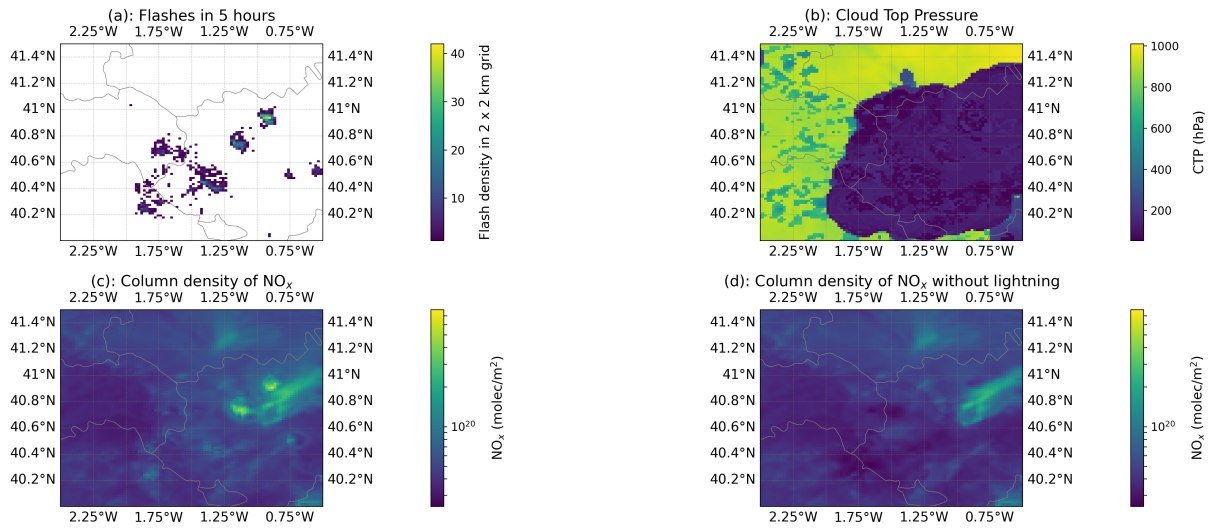

**Figure S19.** Simulation results for 2 September 2024 at 12:20 UTC, focused on the region of interest. (a): Assimilated lightning flashes between 07:20 and 12:20 UTC reported by MTG-LI. (b): Cloud Top Pressure (CTP). (c): Vertical Column Density of NO<sub>x</sub>. (d): Vertical column density of NO<sub>x</sub> in the simulation without fresh LNO<sub>x</sub>, i.e., with LNO<sub>x</sub> deactivated after 07:00 UTC.

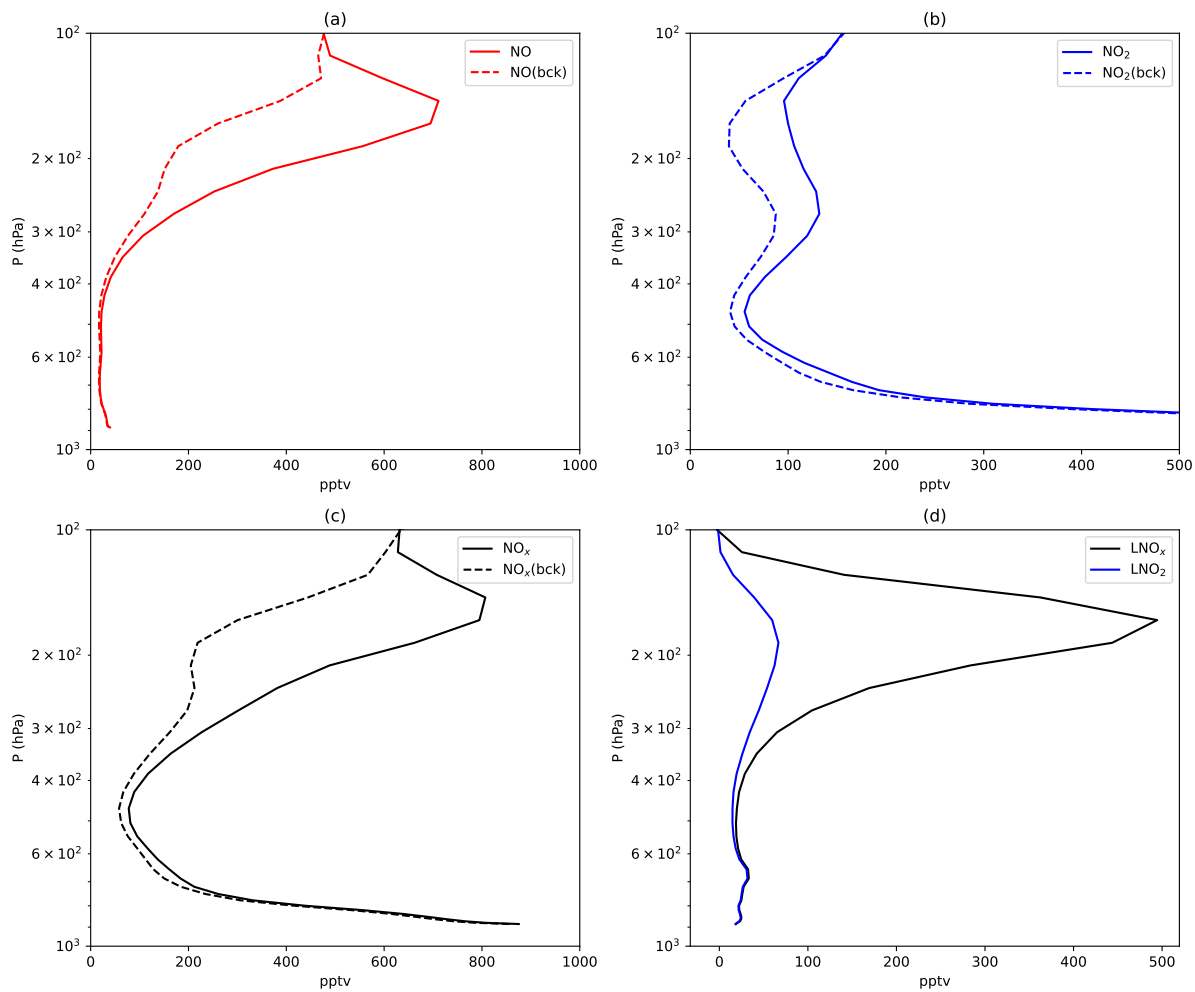

**Figure S20.** Vertical mixing ratio profiles of NO (a), NO<sub>2</sub> (b), NO<sub>x</sub> (c), LNO<sub>x</sub> and LNO<sub>2</sub> (d) extracted from WRF-CHEM simulations with (solid lines) and without (dashed lines) fresh LNO<sub>x</sub> on 2 September 2024 at 12:20 UTC (close to the TROPOMI overpass (background: bck)).

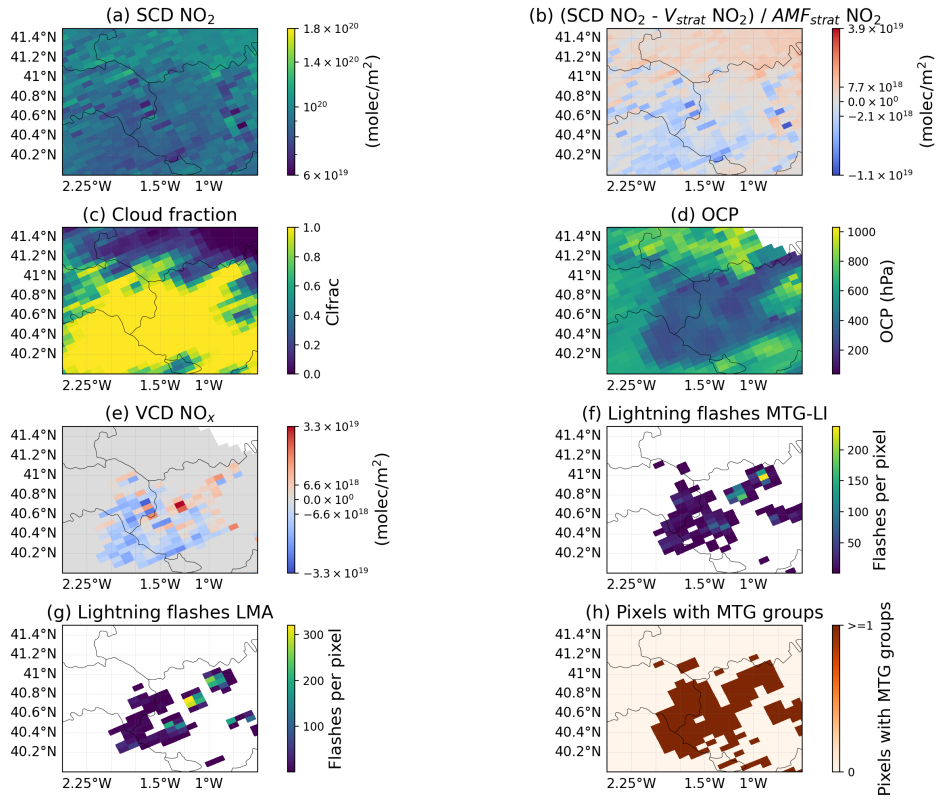

**Figure S21.** TROP-DLR product of orbit 35697, MTG-LI and LMA lightning data for the case 2 September 2024. (a): Slant Column Density (SCD) of NO<sub>2</sub> provided by the TROP-DLR NO<sub>2</sub> research product. (b): SCD NO<sub>2</sub> minus the stratospheric vertical column density and divided to the stratospheric air mass factor of NO<sub>2</sub> obtained from the TROP-DLR NO<sub>2</sub> research product. (c) and (d): Cloud Fraction (CF) and Optical Centroid Pressure (OCP) from the TROP-DLR NO<sub>2</sub> research product, respectively. (e): VCD of NO<sub>x</sub> ( $V_{tropNOx}$ ) over pixels satisfying the DCC. (f) and (g): Lightning flashes during the 5 h period per TROPOMI pixel before the TROPOMI overpass reported by MTG-LI and the LMA, respectively. (h): TROPOMI pixels containing at least one lightning group detected by MTG-LI.

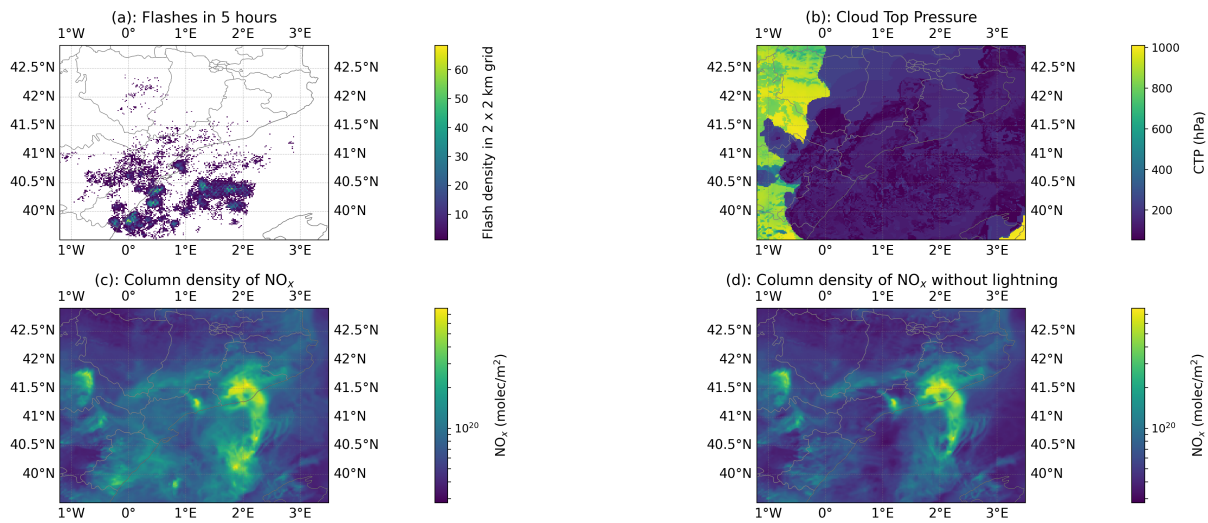

**Figure S22.** Simulation results for 3 September 2024 at 12:00 UTC, focused on the region of interest. (a): Assimilated lightning flashes between 07:00 and 12:00 UTC reported by MTG-LI. (b): Cloud Top Pressure (CTP). (c): Vertical Column Density of NO<sub>x</sub>. (d): Vertical column density of NO<sub>x</sub> in the simulation without fresh LNO<sub>x</sub>, i.e., with LNO<sub>x</sub> deactivated after 07:00 UTC.

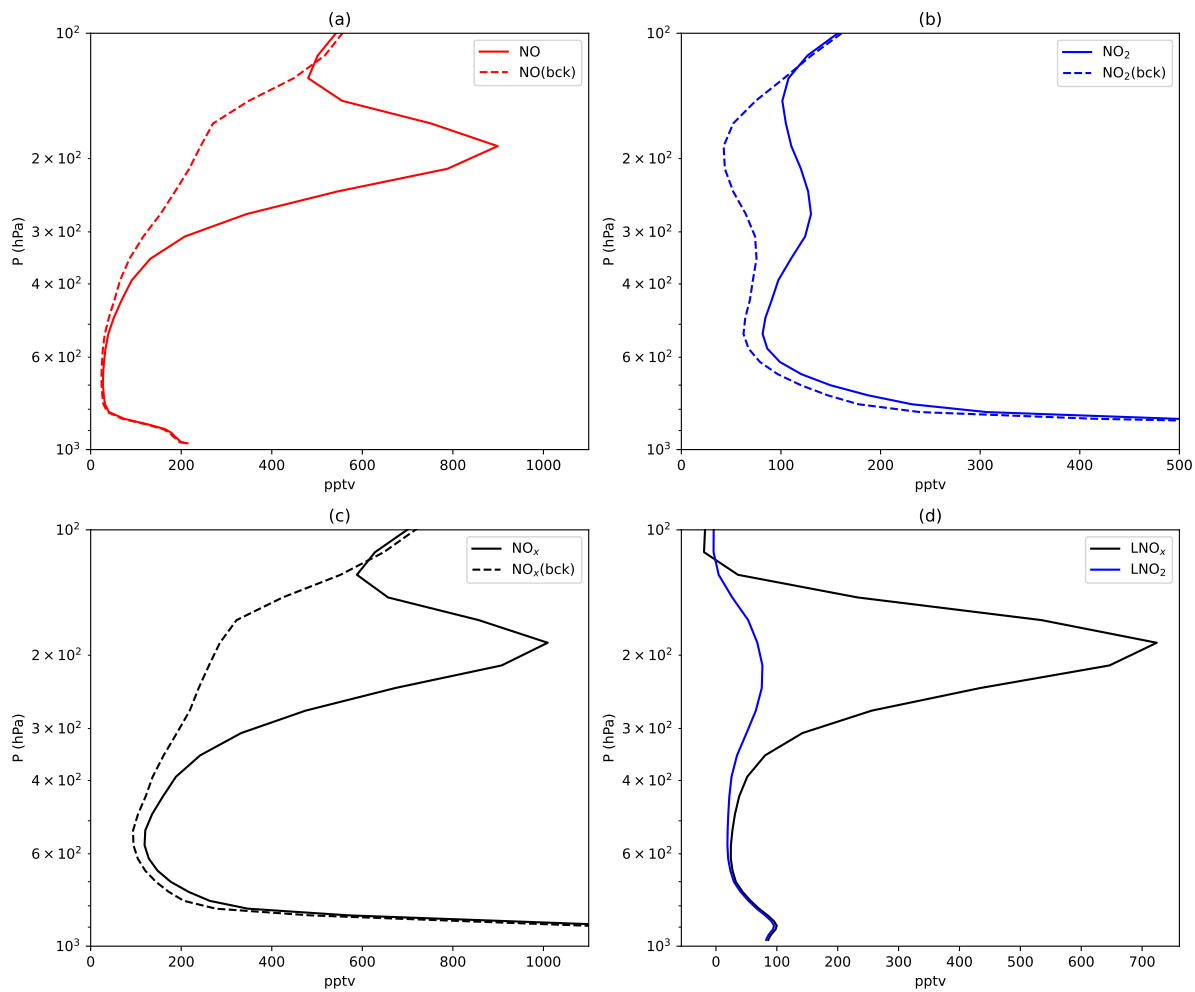

**Figure S23.** Vertical mixing ratio profiles of NO (a), NO<sub>2</sub> (b), NO<sub>x</sub> (c), LNO<sub>x</sub> and LNO<sub>2</sub> (d) extracted from WRF-CHEM simulations with (solid lines) and without (dashed lines) fresh LNO<sub>x</sub> on 3 September 2024 at 12:00 UTC (close to the TROPOMI overpass (background: bck)).

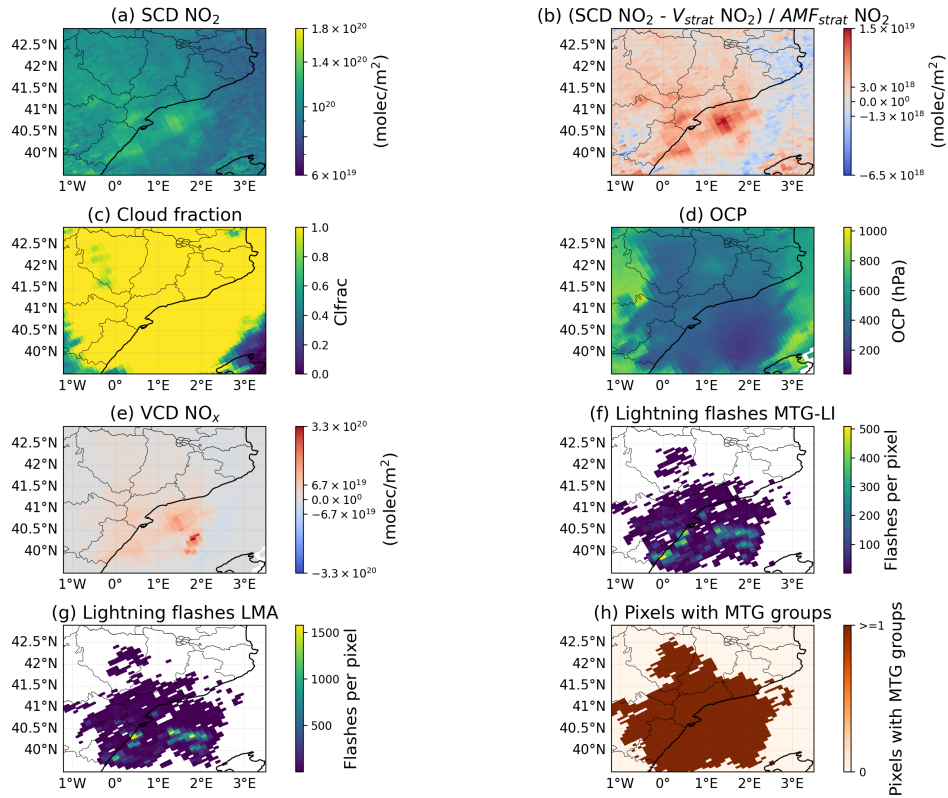

**Figure S24.** TROP-DLR product of orbit 35711, MTG-LI and LMA lightning data for the case 3 September 2024. (a): Slant Column Density (SCD) of  $\text{NO}_2$  provided by the TROP-DLR  $\text{NO}_2$  research product. (b):  $\text{SCD NO}_2 - V_{\text{strat NO}_2} / \text{AMF}_{\text{strat NO}_2}$  obtained from the TROP-DLR  $\text{NO}_2$  research product. (c) and (d): Cloud Fraction (CF) and Optical Centroid Pressure (OCP) from the TROP-DLR  $\text{NO}_2$  research product, respectively. (e):  $\text{VCD of NO}_x (V_{\text{tropNO}_x})$  over pixels satisfying the DCC. (f) and (g): Lightning flashes during the 5 h period per TROPOMI pixel before the TROPOMI overpass reported by MTG-LI and the LMA, respectively. (h): TROPOMI pixels containing at least one lightning group detected by MTG-LI.

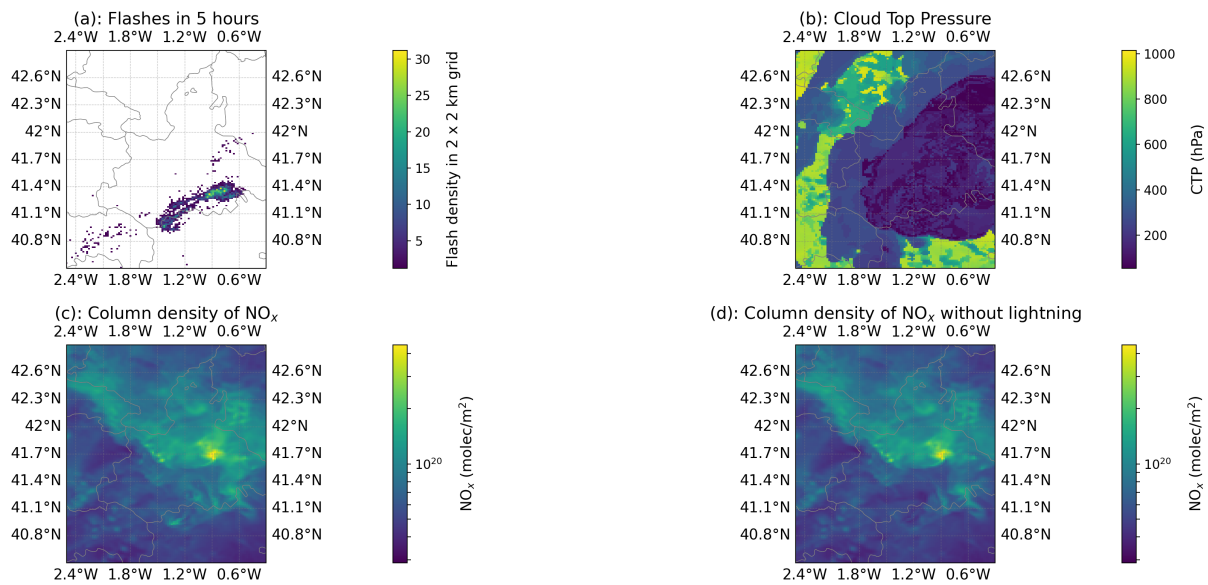

**Figure S25.** Simulation results for 21 September 2024 at 13:10 UTC, focused on the region of interest. (a): Assimilated lightning flashes between 08:10 and 13:10 UTC reported by MTG-LI. (b): Cloud Top Pressure (CTP). (c): Vertical Column Density of NO<sub>x</sub>. (d): Vertical column density of NO<sub>x</sub> in the simulation without fresh LNO<sub>x</sub>, i.e., with LNO<sub>x</sub> deactivated after 07:00 UTC.

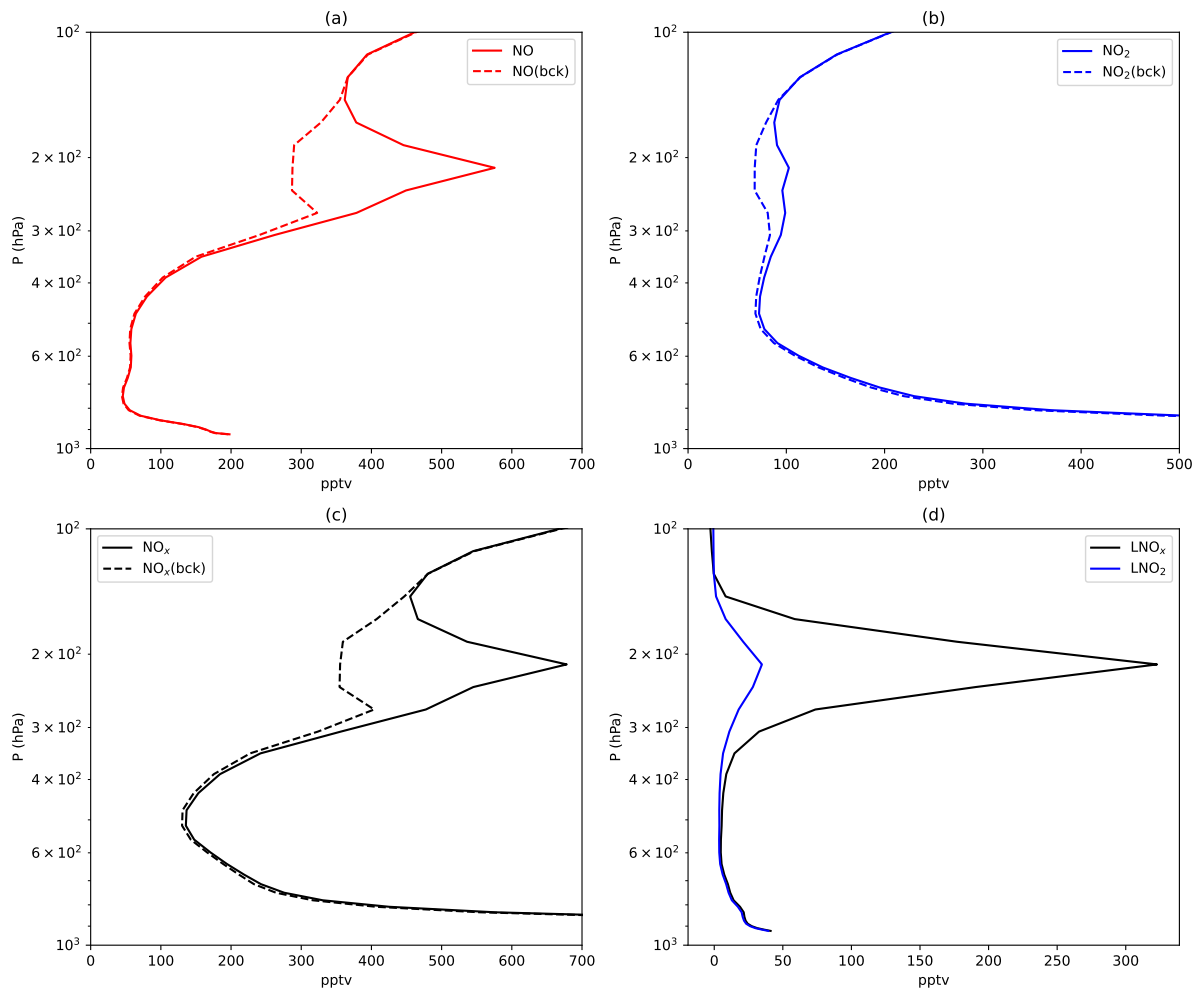

**Figure S26.** Vertical mixing ratio profiles of NO (a), NO<sub>2</sub> (b), NO<sub>x</sub> (c), LNO<sub>x</sub> and LNO<sub>2</sub> (d) extracted from WRF-CHEM simulations with (solid lines) and without (dashed lines) fresh LNO<sub>x</sub> on 21 September 2024 at 13:10 UTC (close to the TROPOMI overpass (background: bck)).

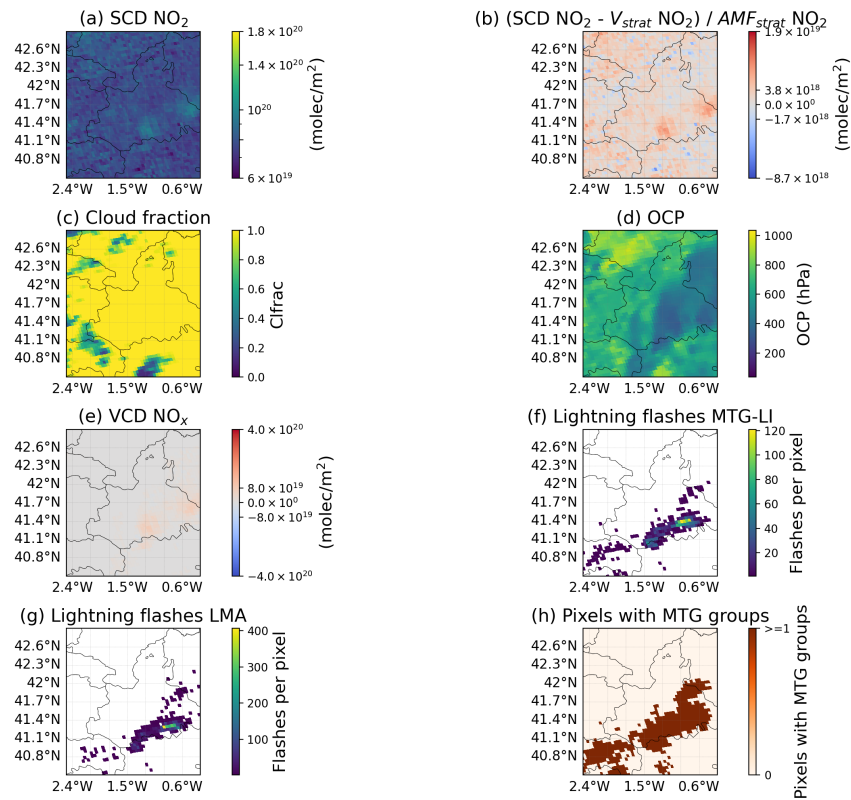

**Figure S27.** TROP-DLR product of orbit 35967, MTG-LI and LMA lightning data for the case 21 September 2024. (a): Slant Column Density (SCD) of  $\text{NO}_2$  provided by the TROP-DLR  $\text{NO}_2$  research product. (b): SCD  $\text{NO}_2$  minus the stratospheric vertical column density and divided to the stratospheric air mass factor of  $\text{NO}_2$  obtained from the TROP-DLR  $\text{NO}_2$  research product. (c) and (d): Cloud Fraction (CF) and Optical Centroid Pressure (OCP) from the TROP-DLR  $\text{NO}_2$  research product, respectively. (e): VCD of  $\text{NO}_x$  ( $V_{trop\text{NO}_x}$ ) over pixels satisfying the DCC. (f) and (g): Lightning flashes during the 5 h period per TROPOMI pixel before the TROPOMI overpass reported by MTG-LI and the LMA, respectively. (h): TROPOMI pixels containing at least one lightning group detected by MTG-LI.

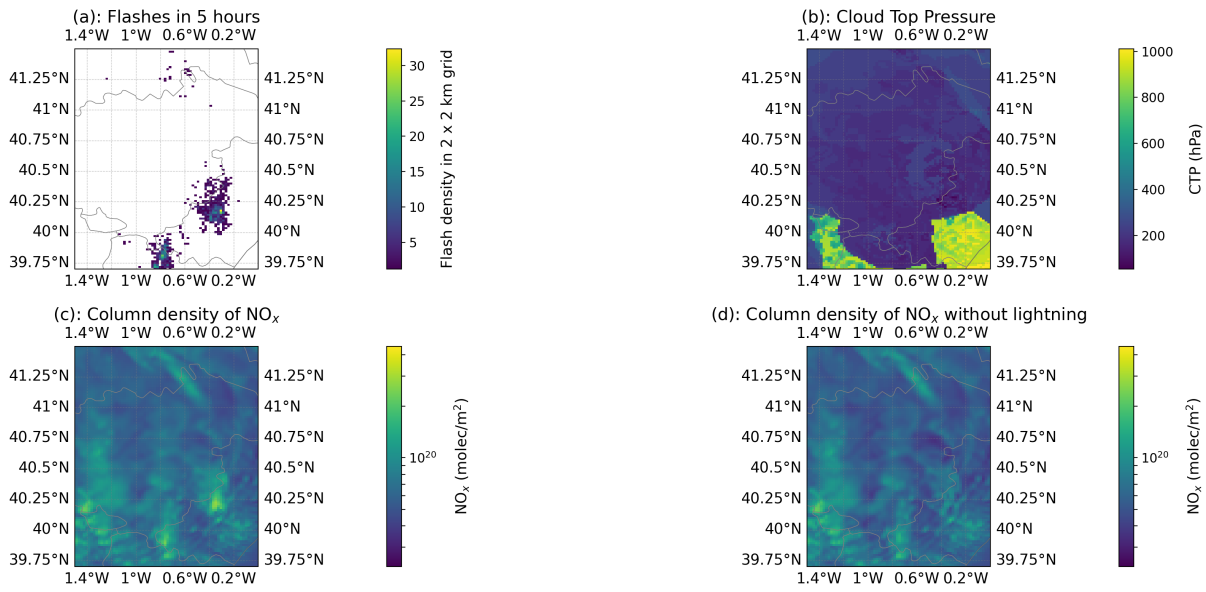

**Figure S28.** Simulation results for 15 October 2024 at 12:10 UTC, focused on the region of interest. (a): Assimilated lightning flashes between 07:10 and 12:10 UTC reported by MTG-LI. (b): Cloud Top Pressure (CTP). (c): Vertical Column Density of NO<sub>x</sub>. (d): Vertical column density of NO<sub>x</sub> in the simulation without fresh LNO<sub>x</sub>, i.e., with LNO<sub>x</sub> deactivated after 07:00 UTC.

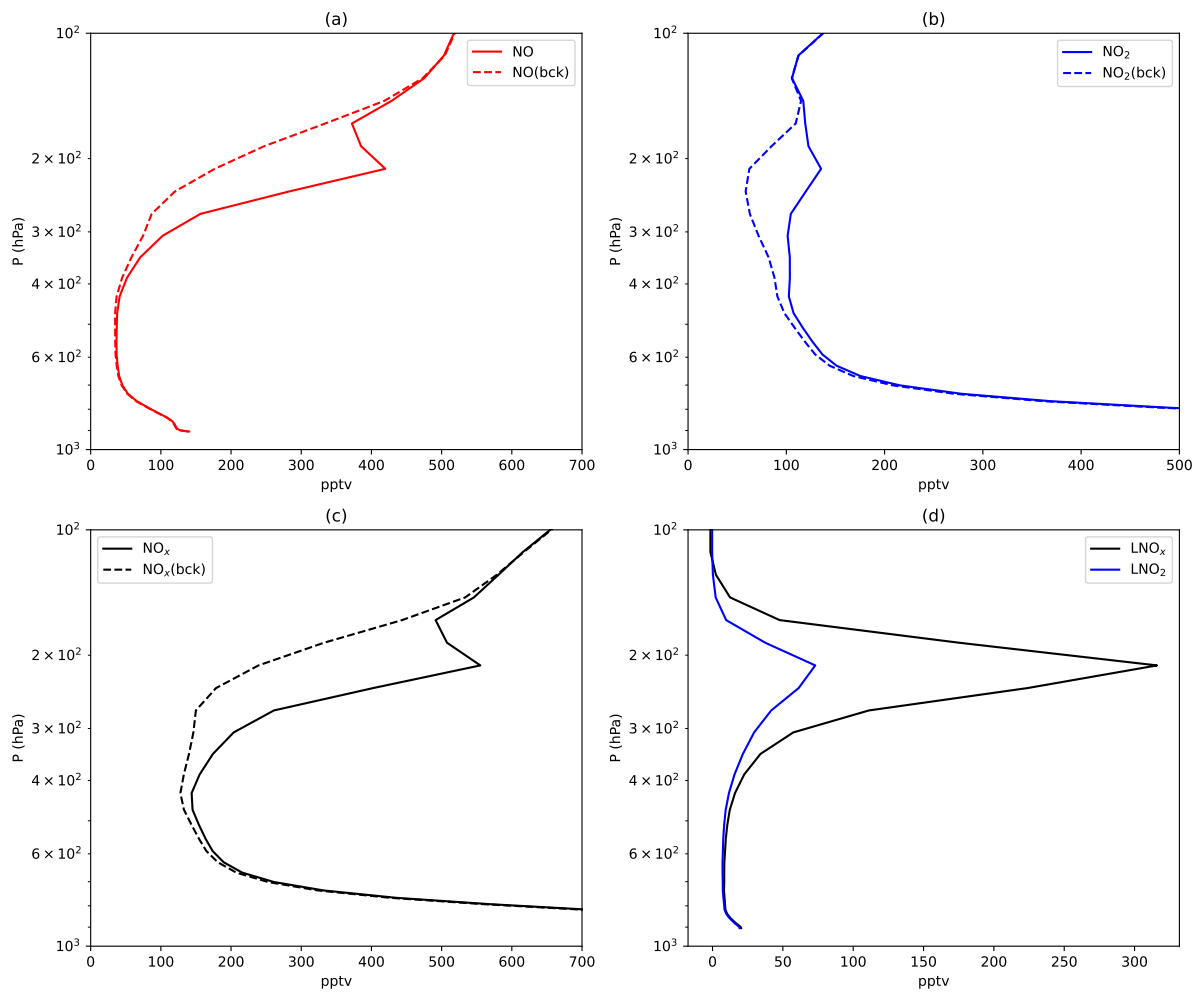

**Figure S29.** Vertical mixing ratio profiles of NO (a), NO<sub>2</sub> (b), NO<sub>x</sub> (c), LNO<sub>x</sub> and LNO<sub>2</sub> (d) extracted from WRF-CHEM simulations with (solid lines) and without (dashed lines) fresh LNO<sub>x</sub> on 15 October 2024 at 12:10 UTC (close to the TROPOMI overpass (background: bck)).

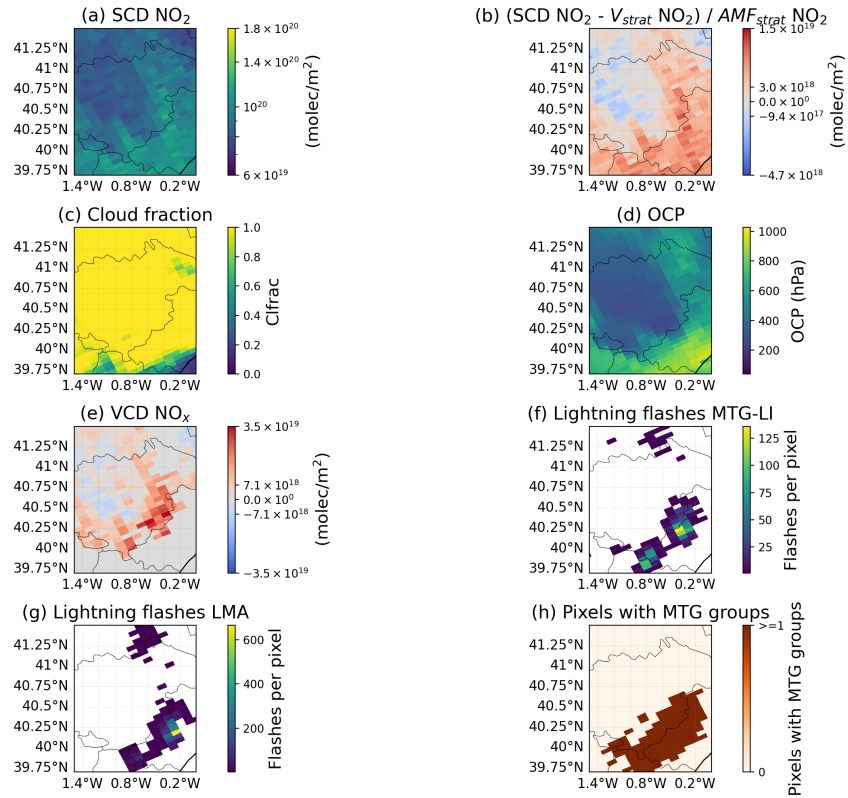

**Figure S30.** TROP-DLR product of orbit 36307, MTG-LI and LMA lightning data for the case 15 October 2024. (a): Slant Column Density (SCD) of  $\text{NO}_2$  provided by the TROP-DLR  $\text{NO}_2$  research product. (b): SCD  $\text{NO}_2$  minus the stratospheric vertical column density and divided to the stratospheric air mass factor of  $\text{NO}_2$  obtained from the TROP-DLR  $\text{NO}_2$  research product. (c) and (d): Cloud Fraction (CF) and Optical Centroid Pressure (OCP) from the TROP-DLR  $\text{NO}_2$  research product, respectively. (e): VCD of  $\text{NO}_x$  ( $V_{trop\text{NO}_x}$ ) over pixels satisfying the DCC. (f) and (g): Lightning flashes during the 5 h period per TROPOMI pixel before the TROPOMI overpass reported by MTG-LI and the LMA, respectively. (h): TROPOMI pixels containing at least one lightning group detected by MTG-LI.

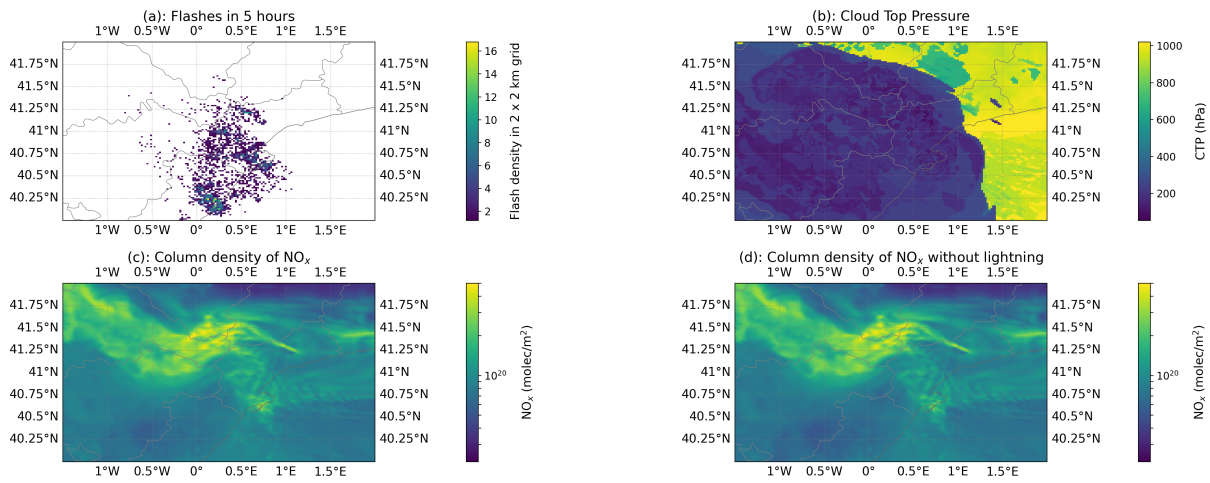

**Figure S31.** Simulation results for 31 October 2024 at 12:30 UTC, focused on the region of interest. (a): Assimilated lightning flashes between 07:30 and 12:30 UTC reported by MTG-LI. (b): Cloud Top Pressure (CTP). (c): Vertical Column Density of  $\text{NO}_x$ . (d): Vertical column density of  $\text{NO}_x$  in the simulation without fresh  $\text{LNO}_x$ , i.e., with  $\text{LNO}_x$  deactivated after 07:00 UTC.

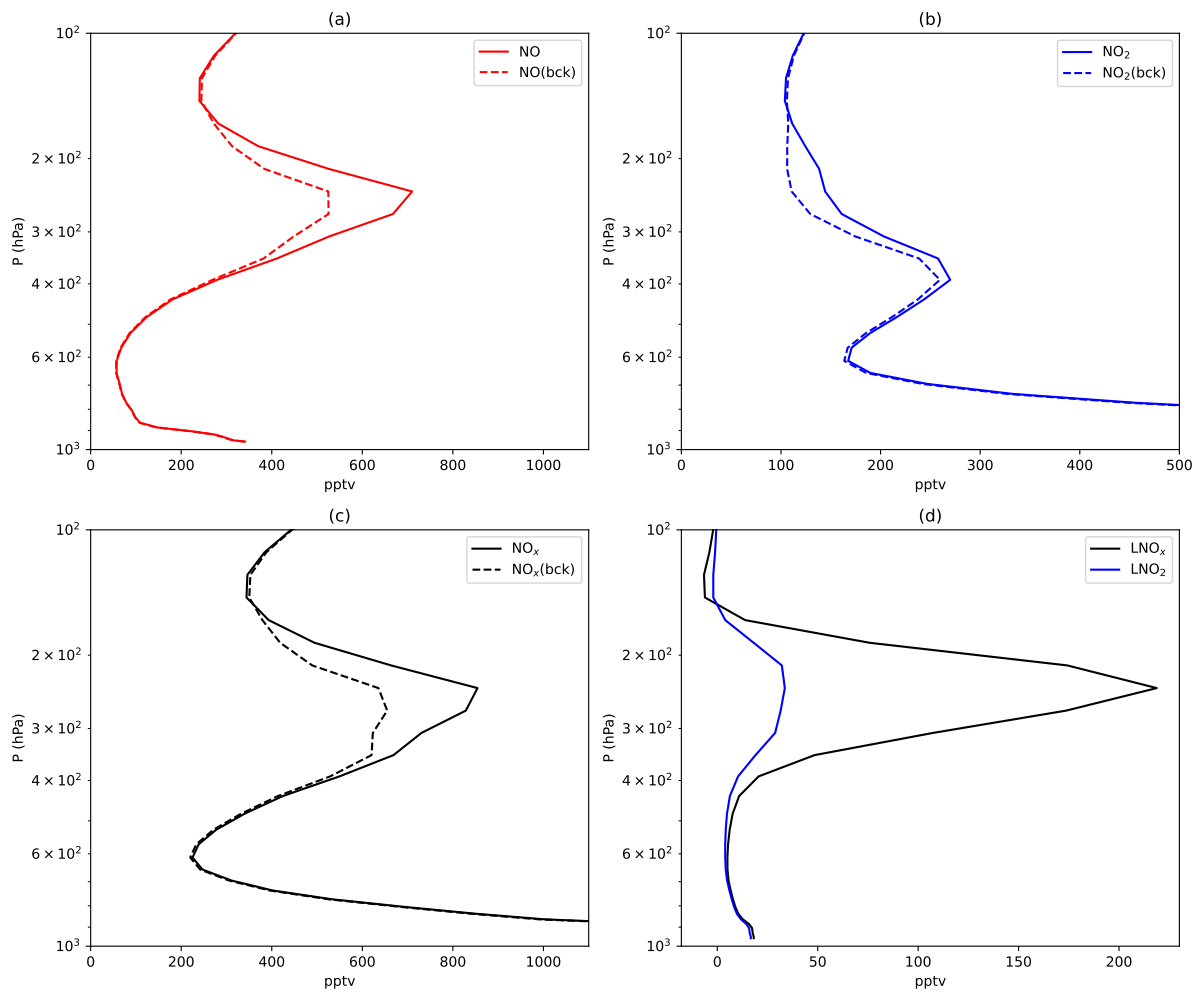

**Figure S32.** Vertical mixing ratio profiles of NO (a), NO<sub>2</sub> (b), NO<sub>x</sub> (c), LNO<sub>x</sub> and LNO<sub>2</sub> (d) extracted from WRF-CHEM simulations with (solid lines) and without (dashed lines) fresh LNO<sub>x</sub> on 31 October 2024 at 12:30 UTC (close to the TROPOMI overpass (background: bck)).

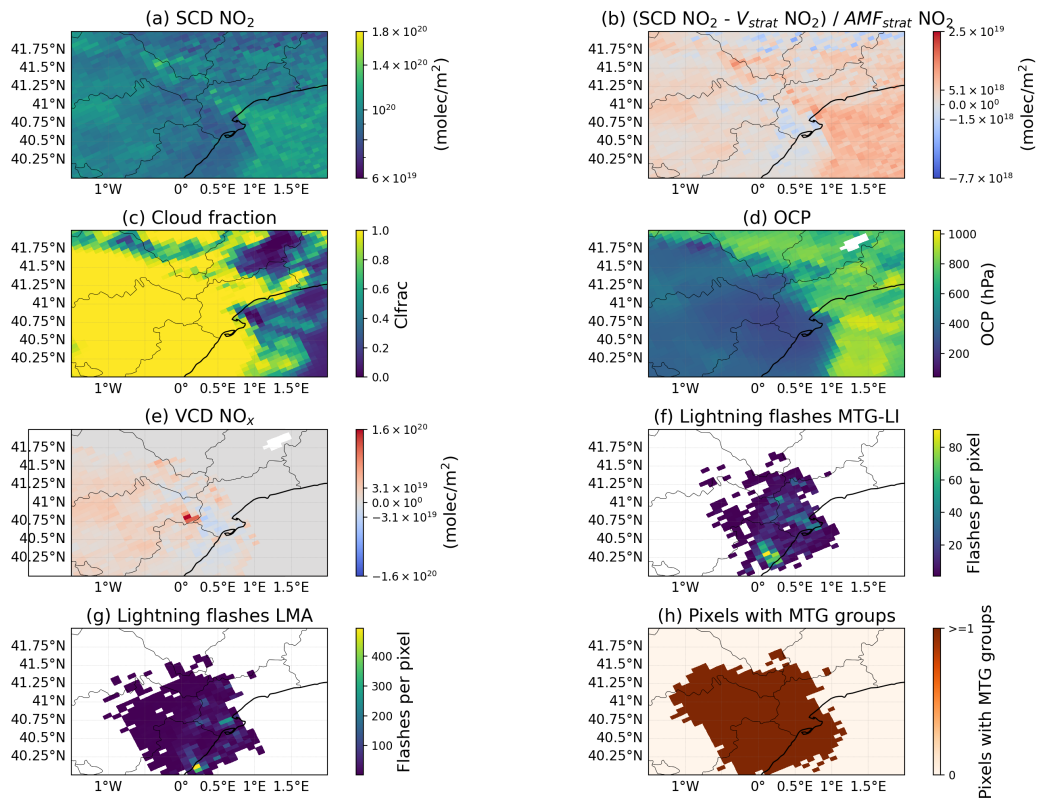

**Figure S33.** TROP-DLR product of orbit 36534, MTG-LI and LMA lightning data for the case 31 October 2024. (a): Slant Column Density (SCD) of  $\text{NO}_2$  provided by the TROP-DLR  $\text{NO}_2$  research product. (b): SCD  $\text{NO}_2$  minus the stratospheric vertical column density and divided to the stratospheric air mass factor of  $\text{NO}_2$  obtained from the TROP-DLR  $\text{NO}_2$  research product. (c) and (d): Cloud Fraction (CF) and Optical Centroid Pressure (OCP) from the TROP-DLR  $\text{NO}_2$  research product, respectively. (e): VCD of  $\text{NO}_x$  ( $V_{trop\text{NO}_x}$ ) over pixels satisfying the DCC. (f) and (g): Lightning flashes during the 5 h period per TROPOMI pixel before the TROPOMI overpass reported by MTG-LI and the LMA, respectively. (h): TROPOMI pixels containing at least one lightning group detected by MTG-LI.

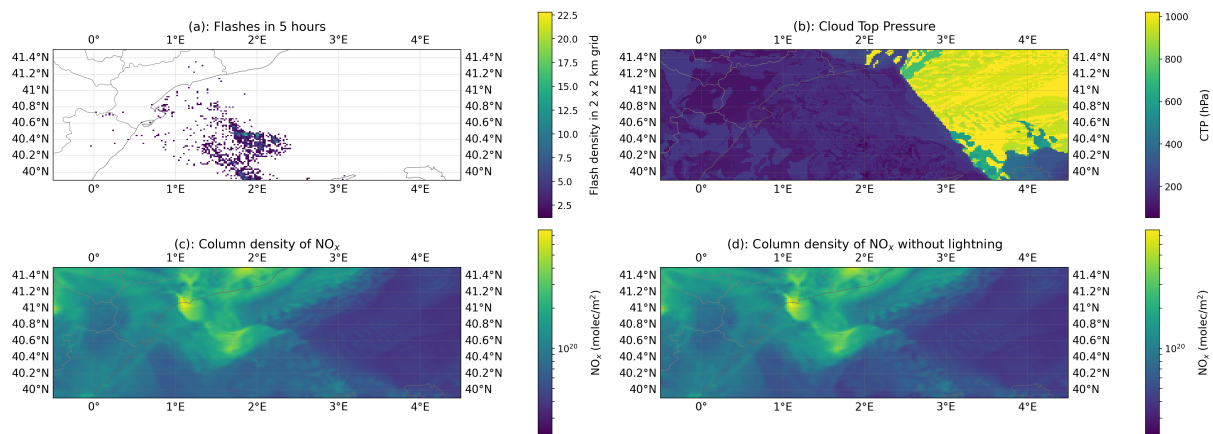

**Figure S34.** Simulation results for 1 November 2024 at 13:40 UTC, focused on the region of interest. (a): Assimilated lightning flashes between 08:40 and 13:40 UTC reported by MTG-LI. (b): Cloud Top Pressure (CTP). (c): Vertical Column Density of  $\text{NO}_x$ . (d): Vertical column density of  $\text{NO}_x$  in the simulation without fresh  $\text{LNO}_x$ , i.e., with  $\text{LNO}_x$  deactivated after 07:00 UTC.

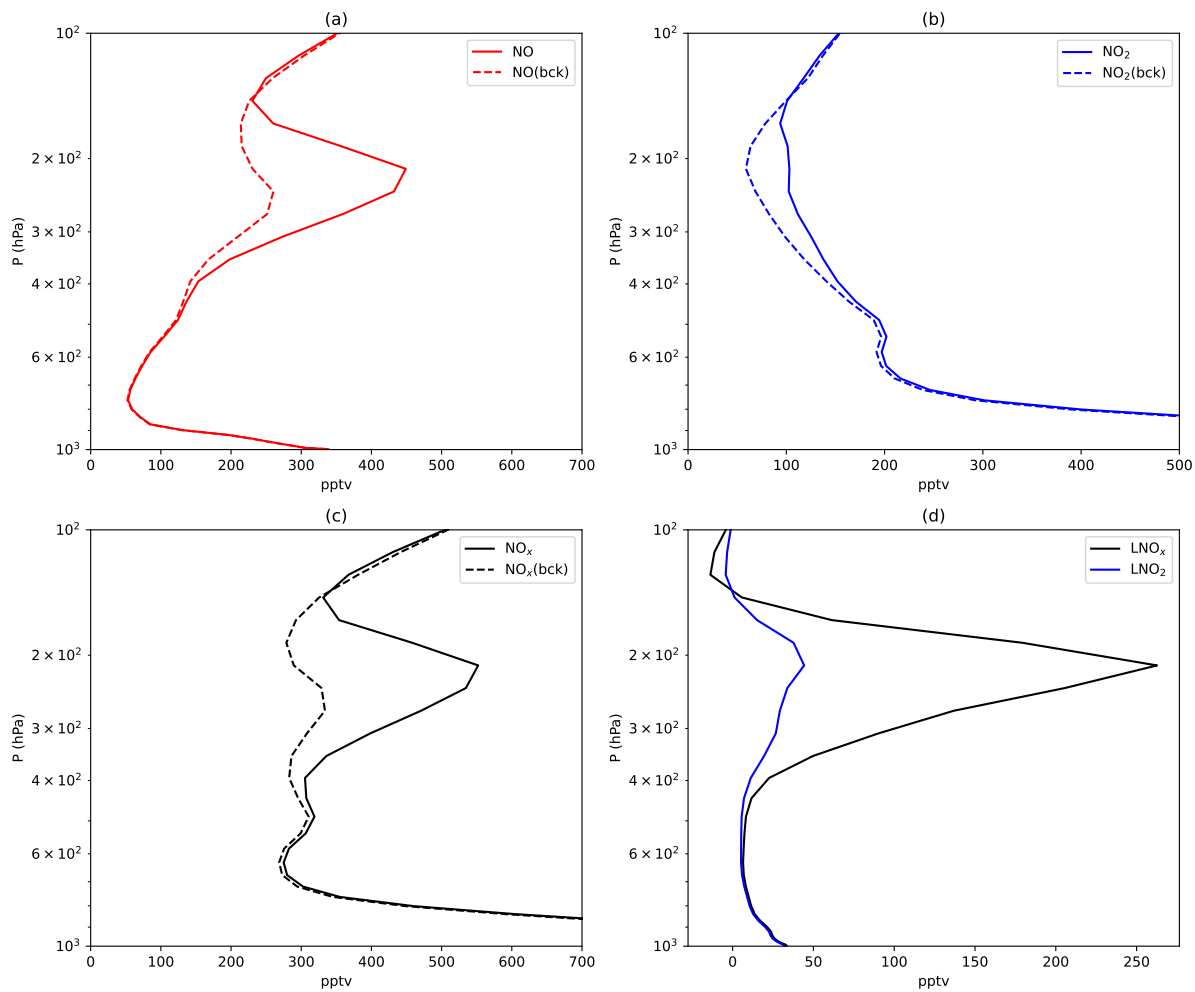

**Figure S35.** Vertical mixing ratio profiles of NO (a), NO<sub>2</sub> (b), NO<sub>x</sub> (c), LNO<sub>x</sub> and LNO<sub>2</sub> (d) extracted from WRF-CHEM simulations with (solid lines) and without (dashed lines) fresh LNO<sub>x</sub> on 1 November 2024 at 13:40 UTC (close to the TROPOMI overpass (background: bck)).

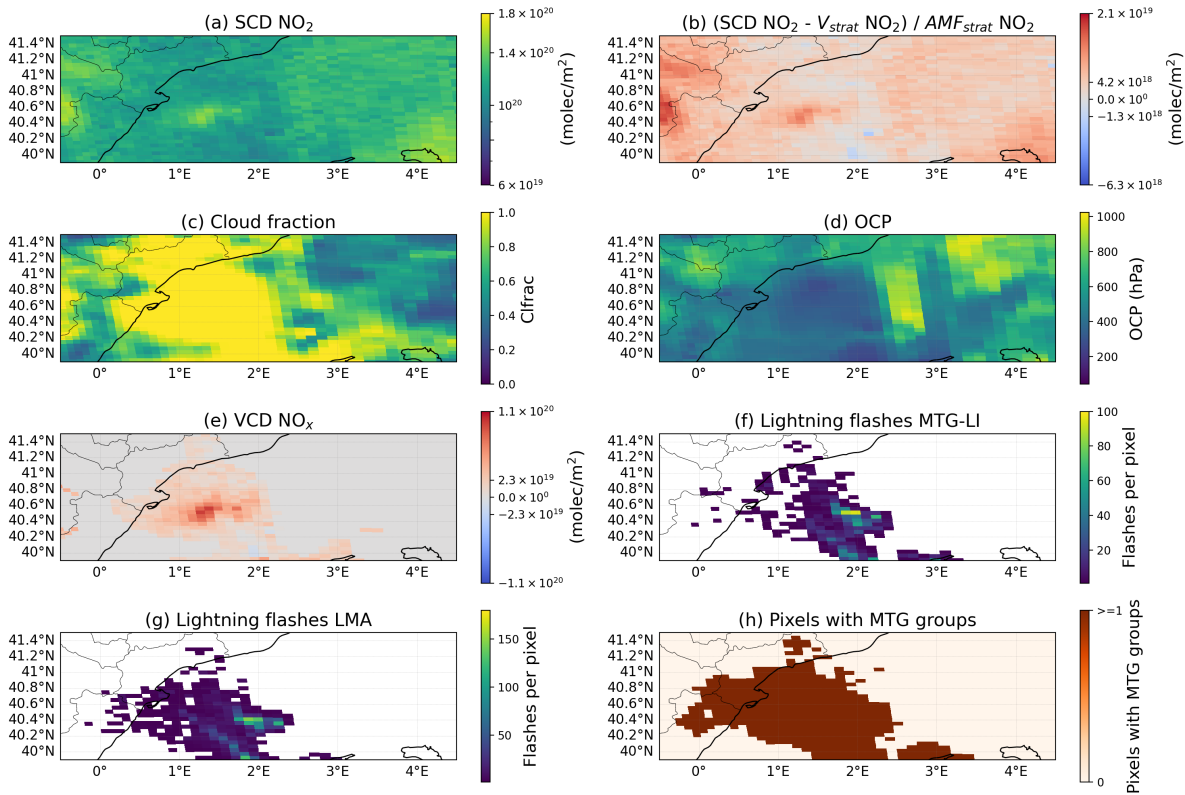

**Figure S36.** TROP-DLR product of orbit 36549, MTG-LI and LMA lightning data for the case 1 November 2024. (a): Slant Column Density (SCD) of NO<sub>2</sub> provided by the TROP-DLR NO<sub>2</sub> research product. (b): SCD NO<sub>2</sub> minus the stratospheric vertical column density and divided to the stratospheric air mass factor of NO<sub>2</sub> obtained from the TROP-DLR NO<sub>2</sub> research product. (c) and (d): Cloud Fraction (CF) and Optical Centroid Pressure (OCP) from the TROP-DLR NO<sub>2</sub> research product, respectively. (e): VCD of NO<sub>x</sub> ( $V_{tropNOx}$ ) over pixels satisfying the DCC. (f) and (g): Lightning flashes during the 5 h period per TROPOMI pixel before the TROPOMI overpass reported by MTG-LI and the LMA, respectively. (h): TROPOMI pixels containing at least one lightning group detected by MTG-LI.

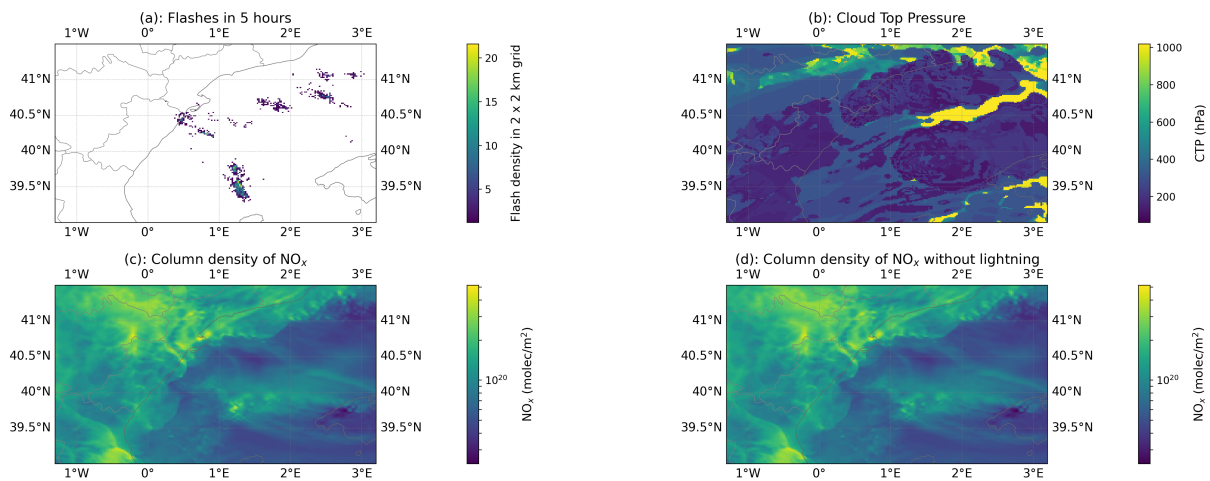

**Figure S37.** Simulation results for 13 November 2024 at 13:10 UTC, focused on the region of interest. (a): Assimilated lightning flashes between 08:10 and 13:10 UTC reported by MTG-LI. (b): Cloud Top Pressure (CTP). (c): Vertical Column Density of  $\text{NO}_x$ . (d): Vertical column density of  $\text{NO}_x$  in the simulation without fresh  $\text{LNO}_x$ , i.e., with  $\text{LNO}_x$  deactivated after 07:00 UTC.

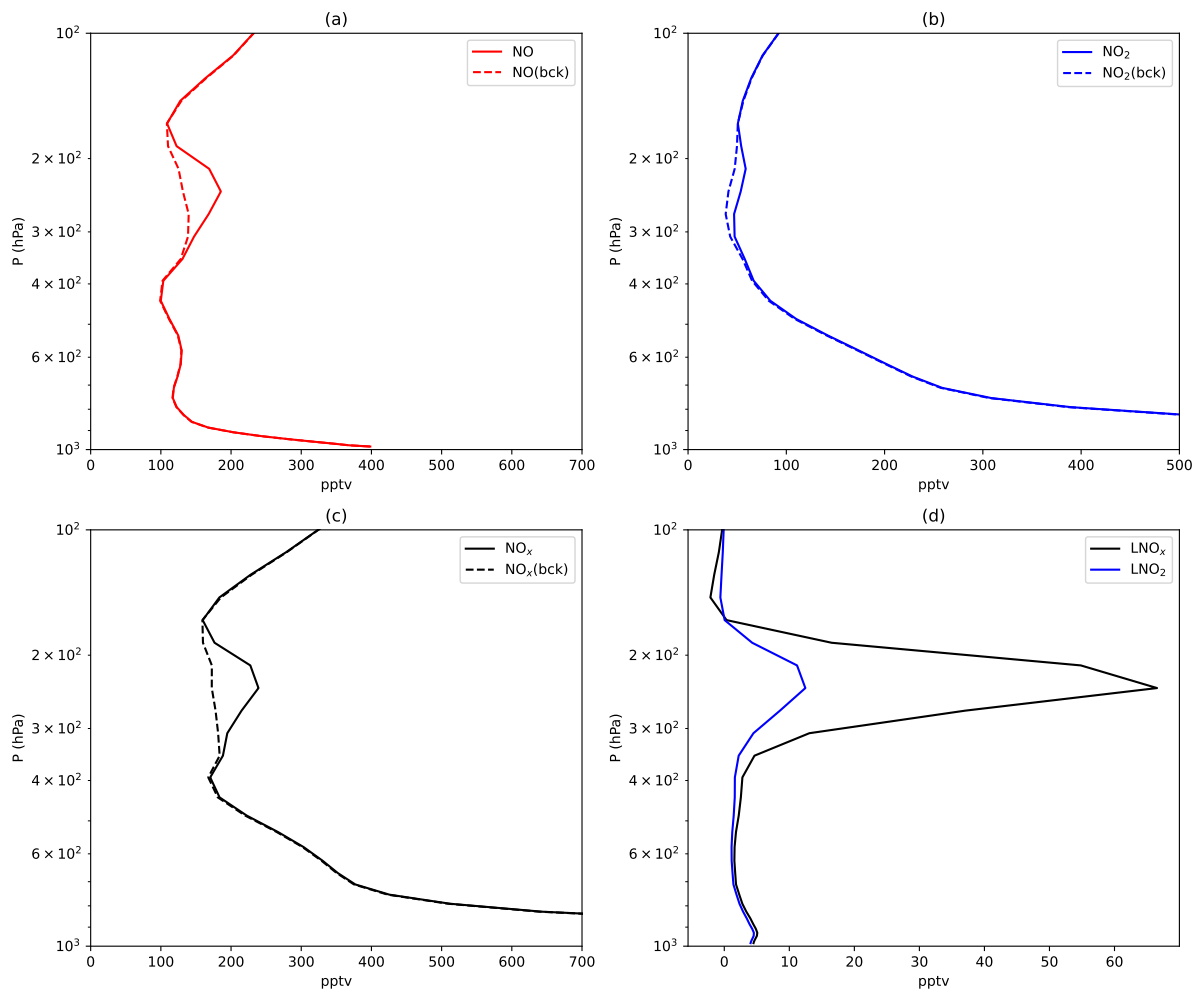

**Figure S38.** Vertical mixing ratio profiles of NO (a), NO<sub>2</sub> (b), NO<sub>x</sub> (c), LNO<sub>x</sub> and LNO<sub>2</sub> (d) extracted from WRF-CHEM simulations with (solid lines) and without (dashed lines) fresh LNO<sub>x</sub> on 13 November 2024 at 13:10 UTC (close to the TROPOMI overpass (background: bck)).

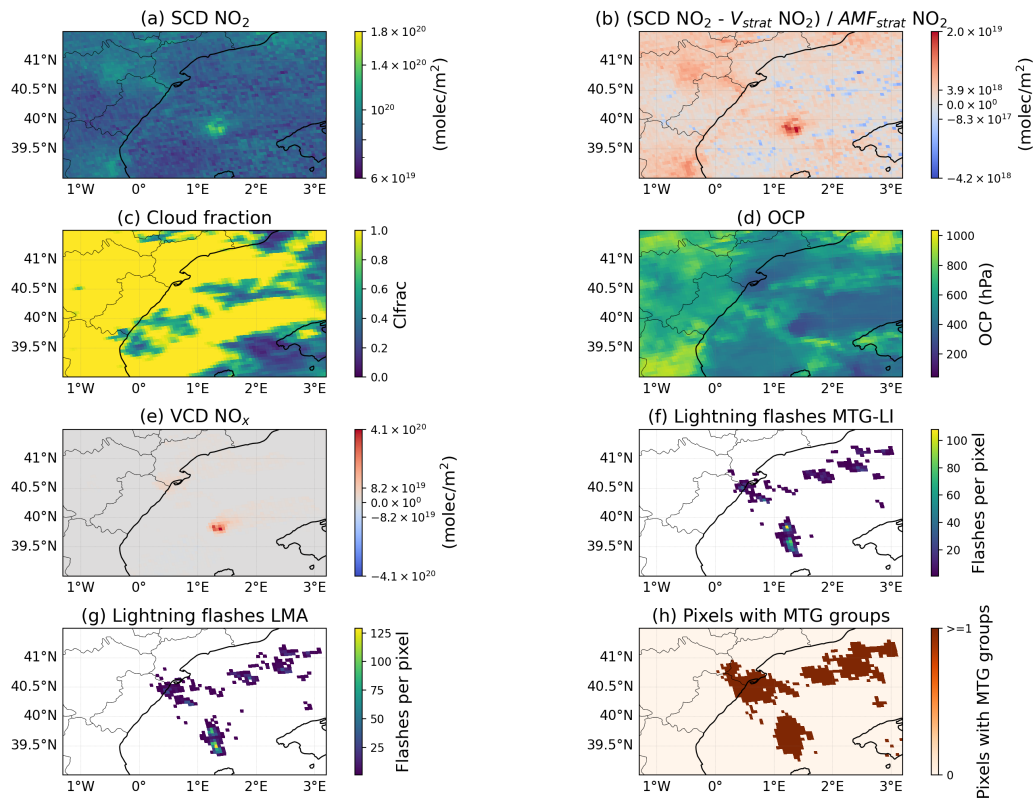

**Figure S39.** TROP-DLR product of orbit 36719, MTG-LI and LMA lightning data for the case 13 November 2024. (a): Slant Column Density (SCD) of  $\text{NO}_2$  provided by the TROP-DLR  $\text{NO}_2$  research product. (b): SCD  $\text{NO}_2$  minus the stratospheric vertical column density and divided to the stratospheric air mass factor of  $\text{NO}_2$  obtained from the TROP-DLR  $\text{NO}_2$  research product. (c) and (d): Cloud Fraction (CF) and Optical Centroid Pressure (OCP) from the TROP-DLR  $\text{NO}_2$  research product, respectively. (e): VCD of  $\text{NO}_x$  ( $V_{trop\text{NO}_x}$ ) over pixels satisfying the DCC. (f) and (g): Lightning flashes during the 5 h period per TROPOMI pixel before the TROPOMI overpass reported by MTG-LI and the LMA, respectively. (h): TROPOMI pixels containing at least one lightning group detected by MTG-LI.

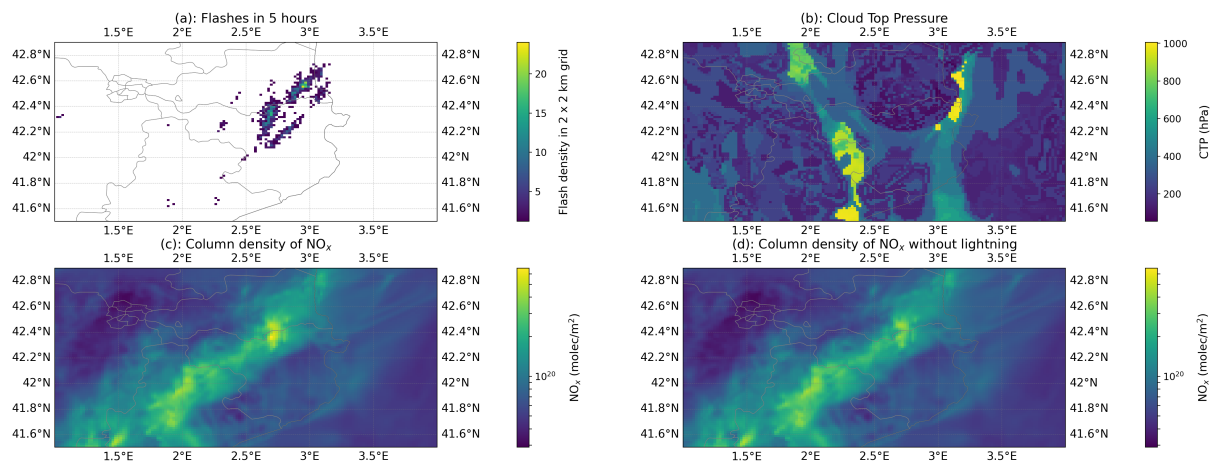

**Figure S40.** Simulation results for 15 April 2025 at 13:50 UTC, focused on the region of interest. (a): Assimilated lightning flashes between 08:50 and 13:50 UTC reported by MTG-LI. (b): Cloud Top Pressure (CTP). (c): Vertical Column Density of  $\text{NO}_x$ . (d): Vertical column density of  $\text{NO}_x$  in the simulation without fresh  $\text{LNO}_x$ , i.e., with  $\text{LNO}_x$  deactivated after 07:00 UTC.

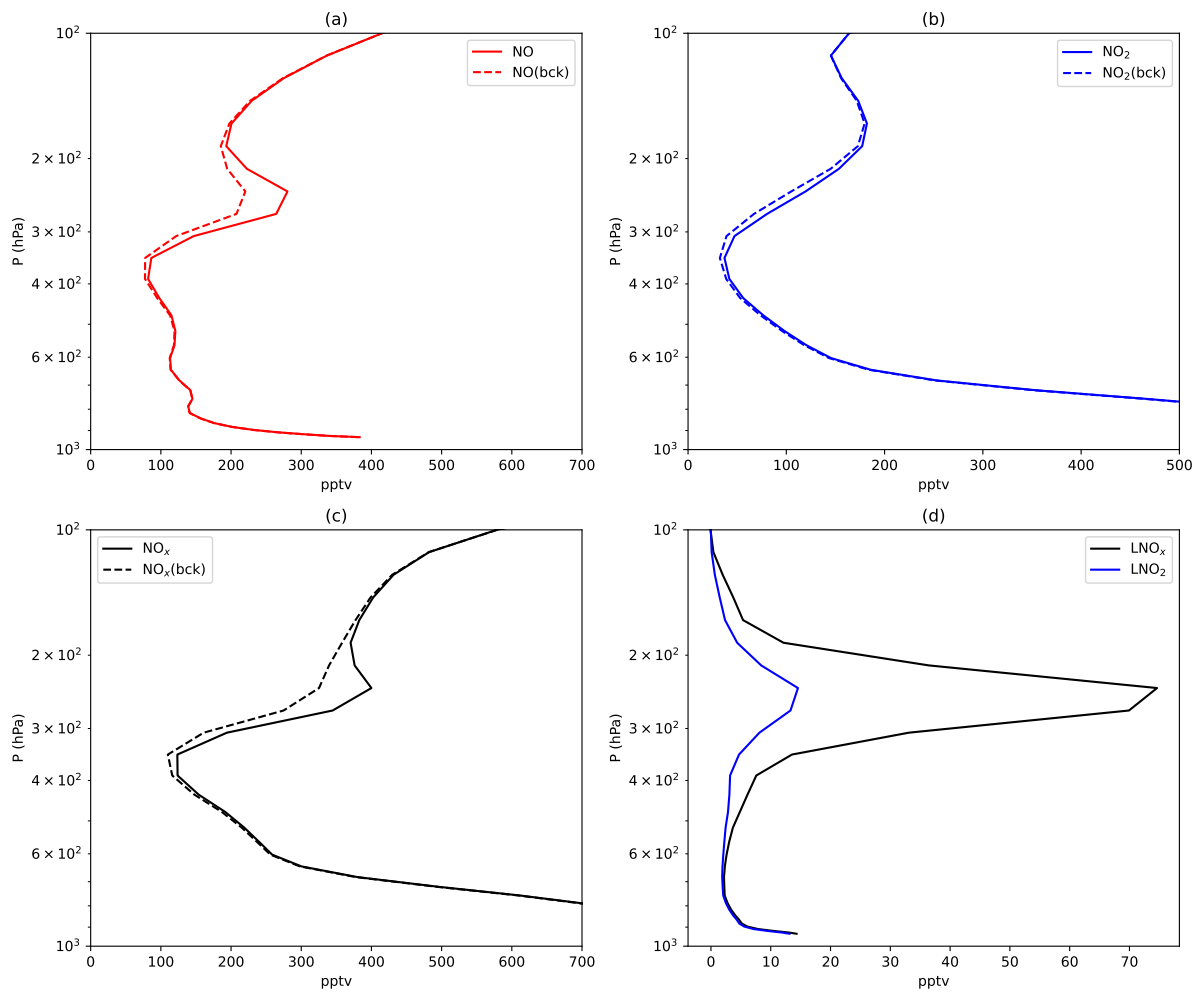

**Figure S41.** Vertical mixing ratio profiles of NO (a), NO<sub>2</sub> (b), NO<sub>x</sub> (c), LNO<sub>x</sub> and LNO<sub>2</sub> (d) extracted from WRF-CHEM simulations with (solid lines) and without (dashed lines) fresh LNO<sub>x</sub> on 15 April 2025 at 13:50 UTC (close to the TROPOMI overpass (background: bck)).

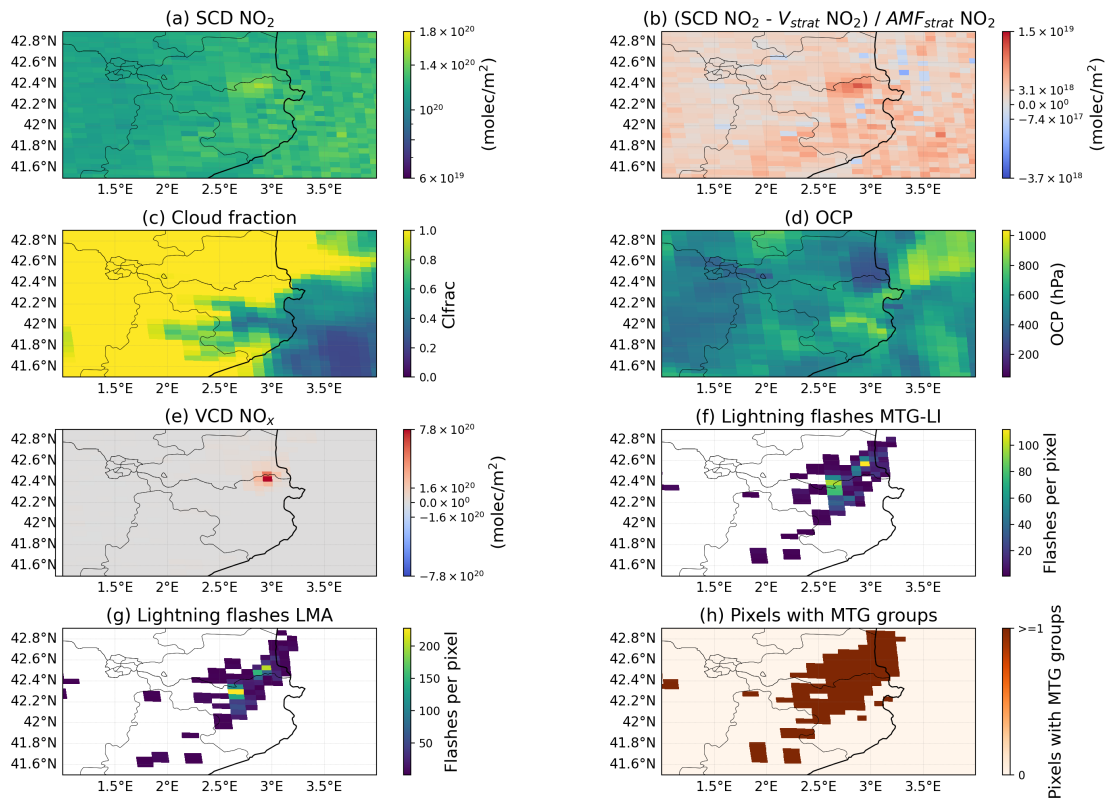

**Figure S42.** TROP-DLR product of orbit 38890, MTG-LI and LMA lightning data for the case 15 April 2025. (a): Slant Column Density (SCD) of NO<sub>2</sub> provided by the TROP-DLR NO<sub>2</sub> research product. (b): SCD NO<sub>2</sub> minus the stratospheric vertical column density and divided to the stratospheric air mass factor of NO<sub>2</sub> obtained from the TROP-DLR NO<sub>2</sub> research product. (c) and (d): Cloud Fraction (CF) and Optical Centroid Pressure (OCP) from the TROP-DLR NO<sub>2</sub> research product, respectively. (e): VCD of NO<sub>x</sub> ( $V_{tropNO_x}$ ) over pixels satisfying the DCC. (f) and (g): Lightning flashes during the 5 h period per TROPOMI pixel before the TROPOMI overpass reported by MTG-LI and the LMA, respectively. (h): TROPOMI pixels containing at least one lightning group detected by MTG-LI.

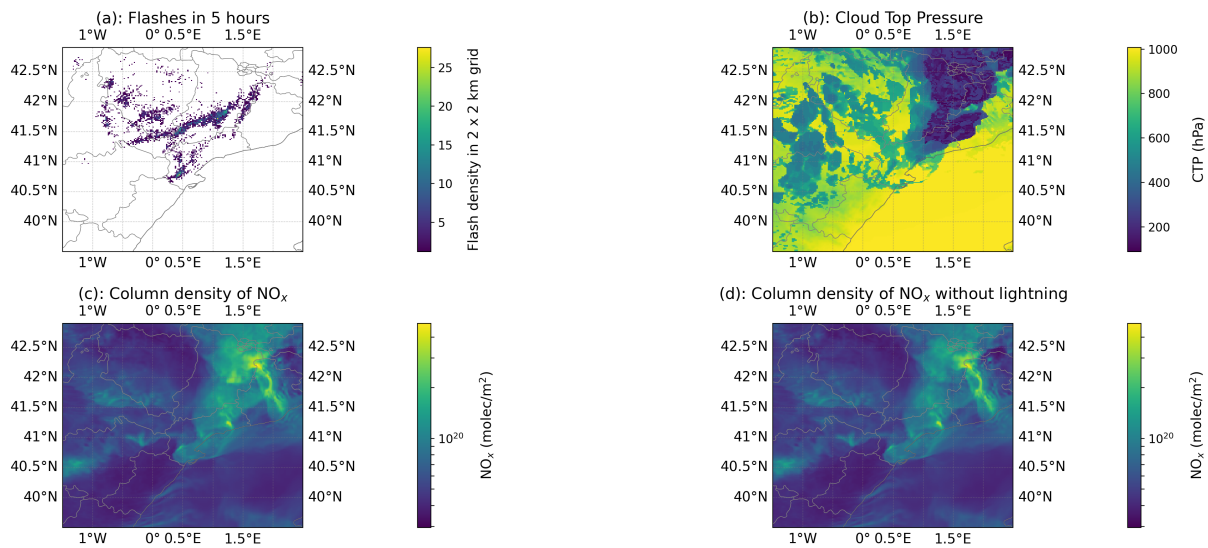

**Figure S43.** Simulation results for 19 April 2025 at 13:30 UTC, focused on the region of interest. (a): Assimilated lightning flashes between 08:30 and 13:30 UTC reported by MTG-LI. (b): Cloud Top Pressure (CTP). (c): Vertical Column Density of NO<sub>x</sub>. (d): Vertical column density of NO<sub>x</sub> in the simulation without fresh LNO<sub>x</sub>, i.e., with LNO<sub>x</sub> deactivated after 07:00 UTC.

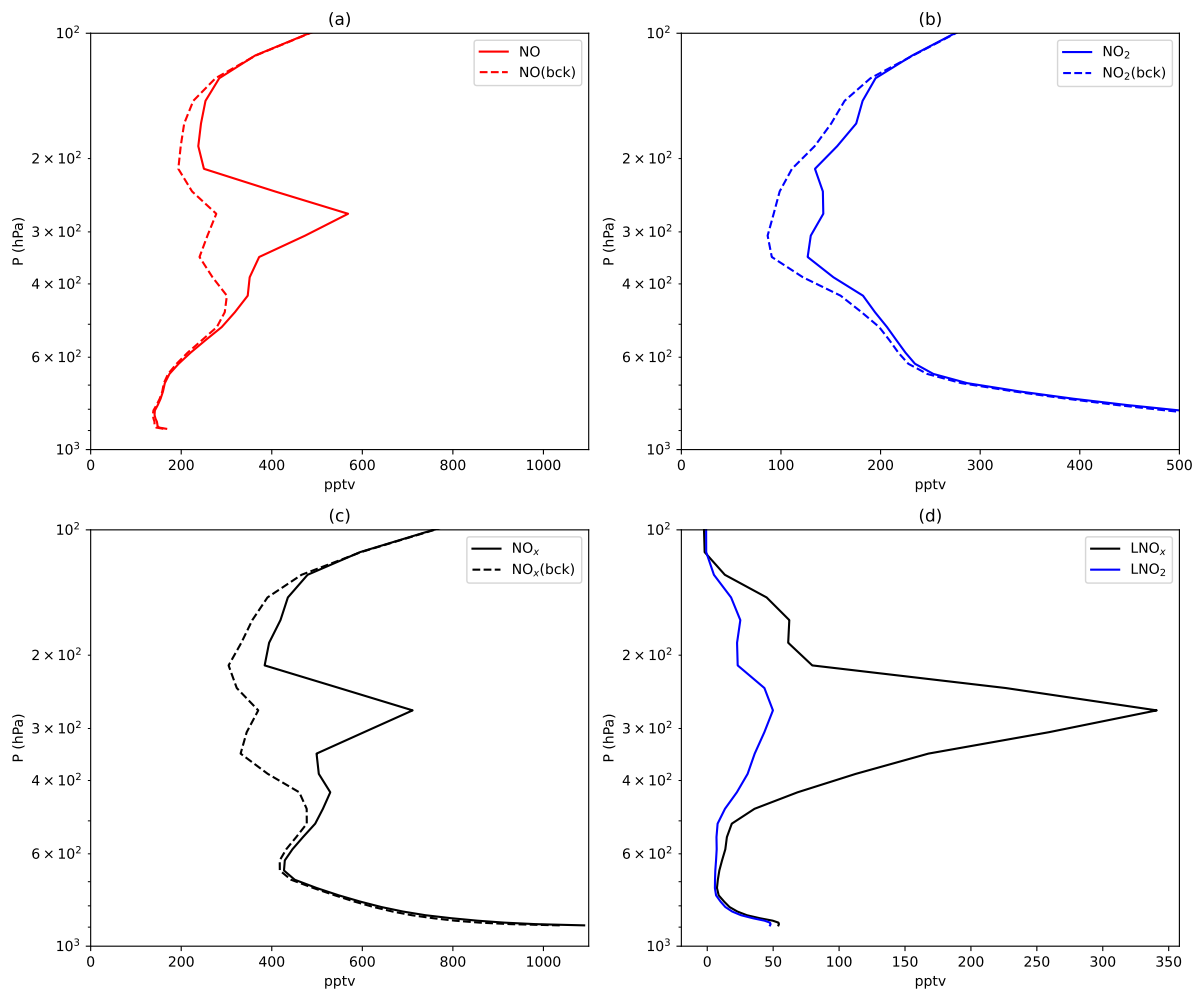

**Figure S44.** Vertical mixing ratio profiles of NO (a), NO<sub>2</sub> (b), NO<sub>x</sub> (c), LNO<sub>x</sub> and LNO<sub>2</sub> (d) extracted from WRF-CHEM simulations with (solid lines) and without (dashed lines) fresh LNO<sub>x</sub> on 19 April 2025 at 13:30 UTC (close to the TROPOMI overpass (background: bck)).

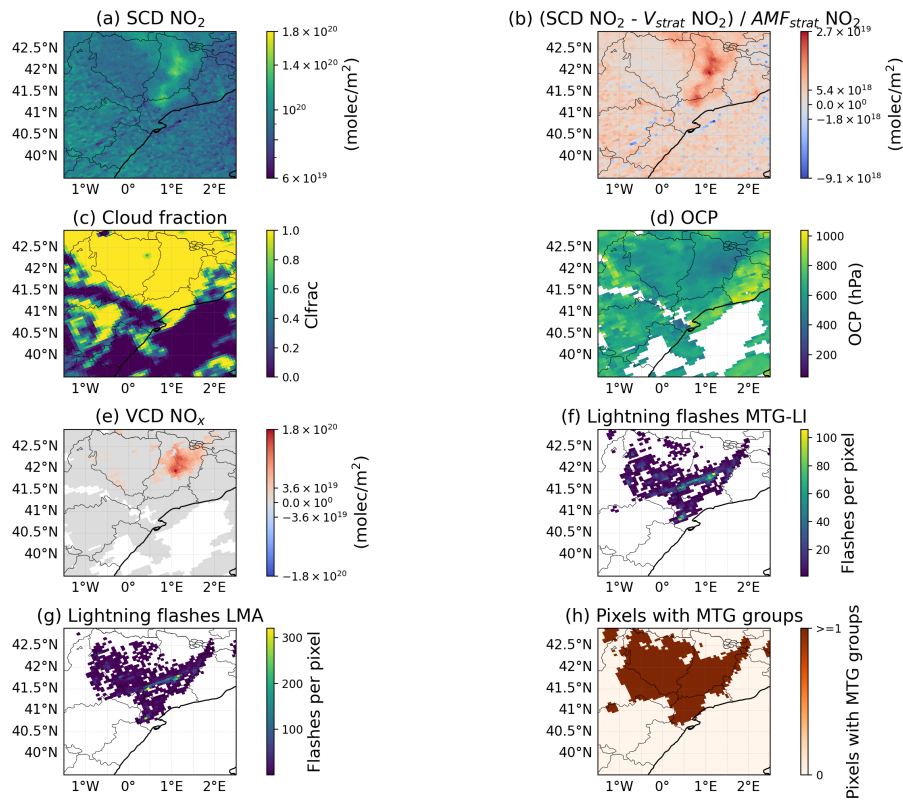

**Figure S45.** TROP-DLR product of orbit 38946, MTG-LI and LMA lightning data for the case 19 April 2025. (a): Slant Column Density (SCD) of NO<sub>2</sub> provided by the TROP-DLR NO<sub>2</sub> research product. (b): SCD NO<sub>2</sub> minus the stratospheric vertical column density and divided to the stratospheric air mass factor of NO<sub>2</sub> obtained from the TROP-DLR NO<sub>2</sub> research product. (c) and (d): Cloud Fraction (CF) and Optical Centroid Pressure (OCP) from the TROP-DLR NO<sub>2</sub> research product, respectively. (e): VCD of NO<sub>x</sub> ( $V_{tropNO_x}$ ) over pixels satisfying the DCC. (f) and (g): Lightning flashes during the 5 h period per TROPOMI pixel before the TROPOMI overpass reported by MTG-LI and the LMA, respectively. (h): TROPOMI pixels containing at least one lightning group detected by MTG-LI.

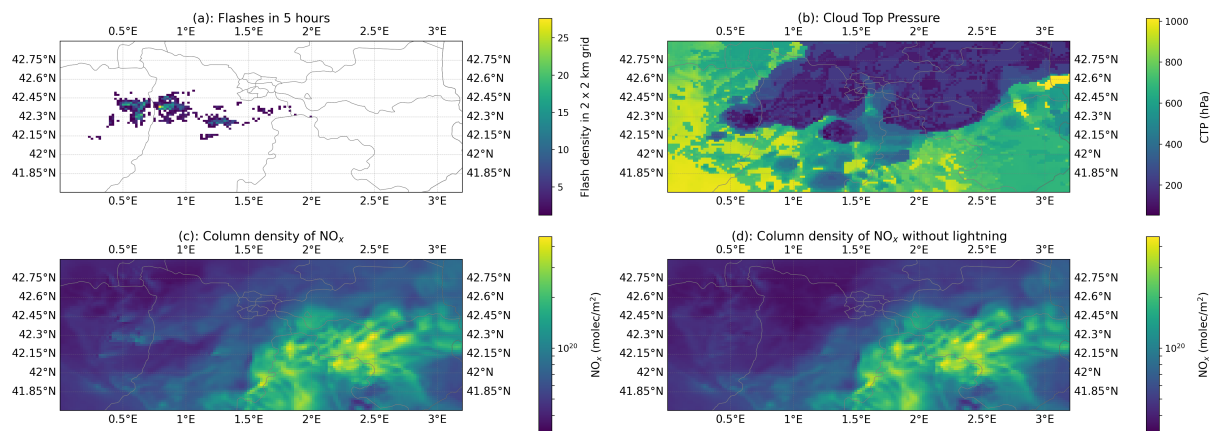

**Figure S46.** Simulation results for 26 April 2025 at 13:40 UTC, focused on the region of interest. (a): Assimilated lightning flashes between 08:40 and 13:40 UTC reported by MTG-LI. (b): Cloud Top Pressure (CTP). (c): Vertical Column Density of  $\text{NO}_x$ . (d): Vertical column density of  $\text{NO}_x$  in the simulation without fresh  $\text{LNO}_x$ , i.e., with  $\text{LNO}_x$  deactivated after 07:00 UTC.

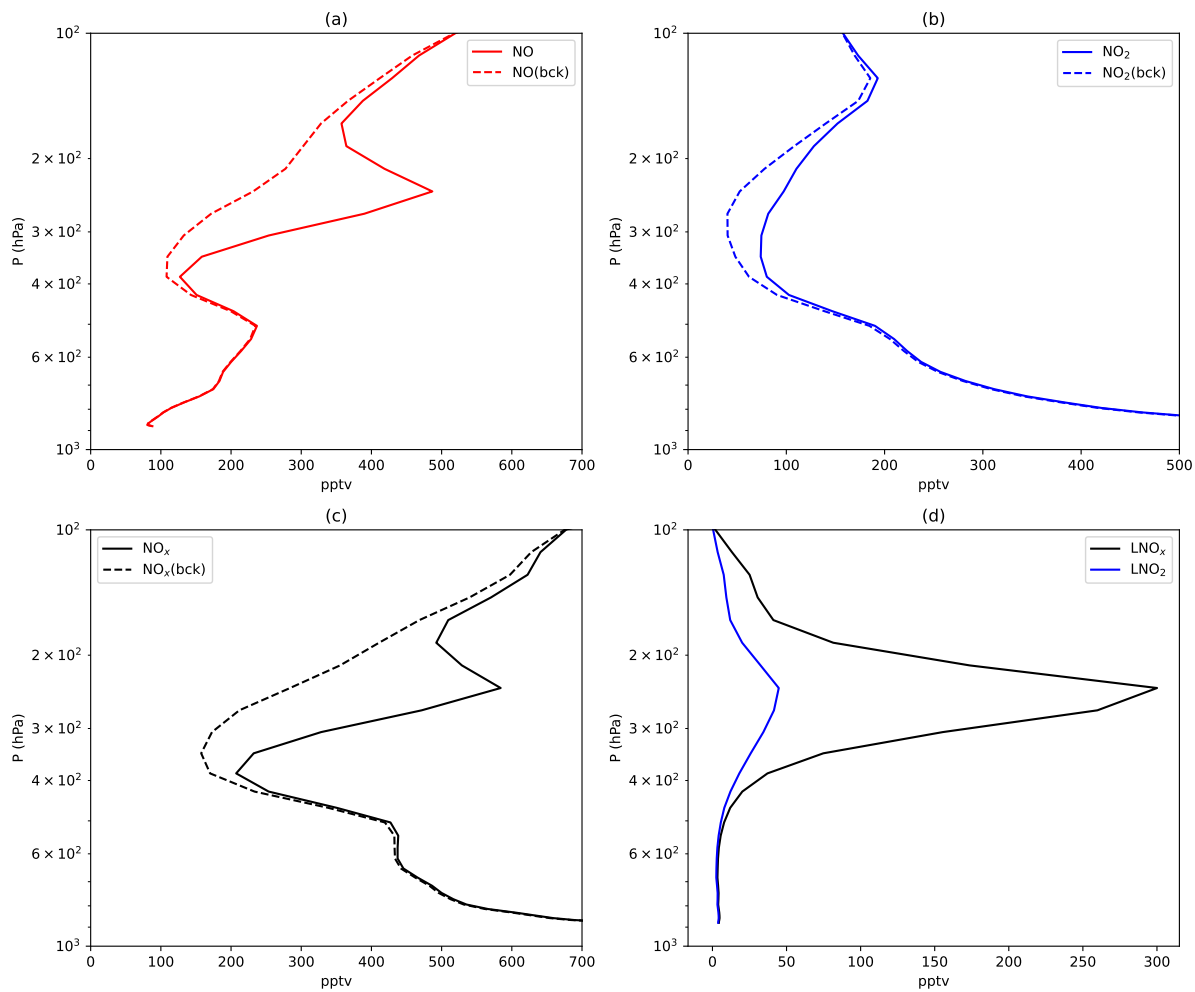

**Figure S47.** Vertical mixing ratio profiles of NO (a), NO<sub>2</sub> (b), NO<sub>x</sub> (c), LNO<sub>x</sub> and LNO<sub>2</sub> (d) extracted from WRF-CHEM simulations with (solid lines) and without (dashed lines) fresh LNO<sub>x</sub> on 26 April 2025 at 13:40 UTC (close to the TROPOMI overpass (background: bck)).

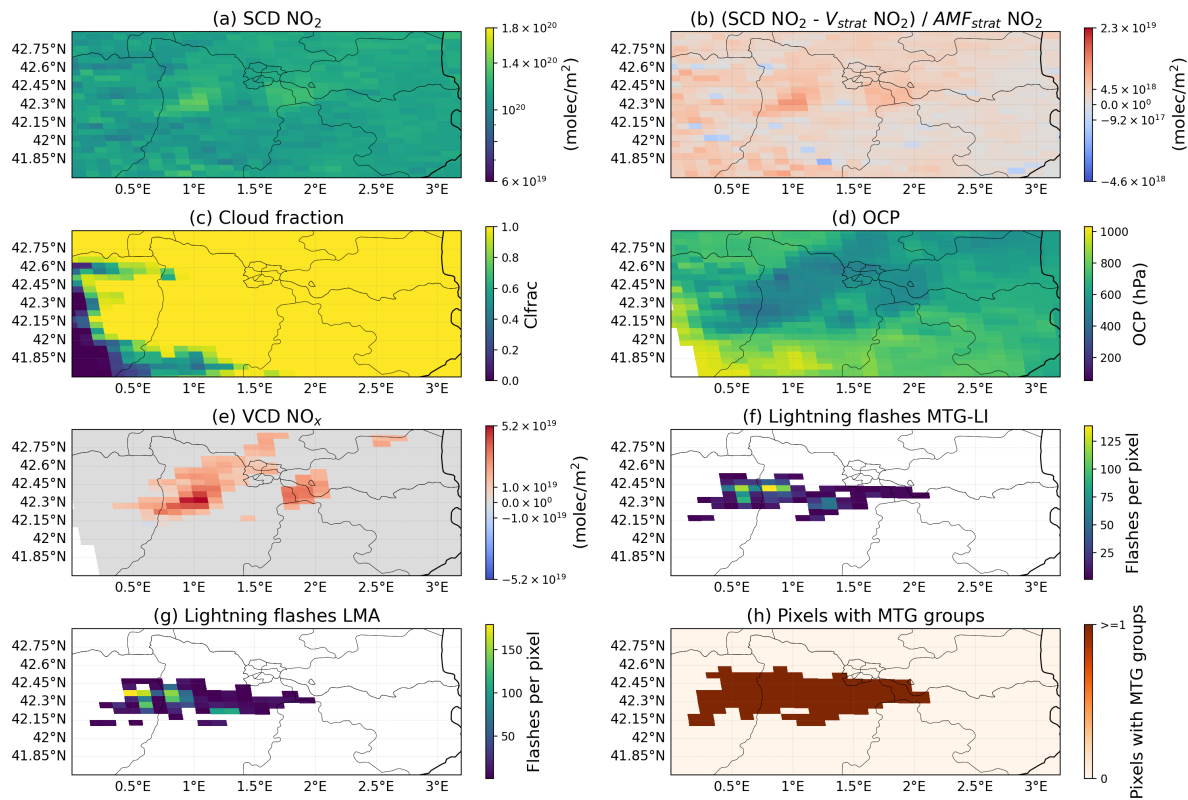

**Figure S48.** TROP-DLR product of orbit 39046, MTG-LI and LMA lightning data for the case 26 April 2025. (a): Slant Column Density (SCD) of NO<sub>2</sub> provided by the TROP-DLR NO<sub>2</sub> research product. (b): SCD NO<sub>2</sub> minus the stratospheric vertical column density and divided to the stratospheric air mass factor of NO<sub>2</sub> obtained from the TROP-DLR NO<sub>2</sub> research product. (c) and (d): Cloud Fraction (CF) and Optical Centroid Pressure (OCP) from the TROP-DLR NO<sub>2</sub> research product, respectively. (e): VCD of NO<sub>x</sub> ( $V_{tropNO_x}$ ) over pixels satisfying the DCC. (f) and (g): Lightning flashes during the 5 h period per TROPOMI pixel before the TROPOMI overpass reported by MTG-LI and the LMA, respectively. (h): TROPOMI pixels containing at least one lightning group detected by MTG-LI.

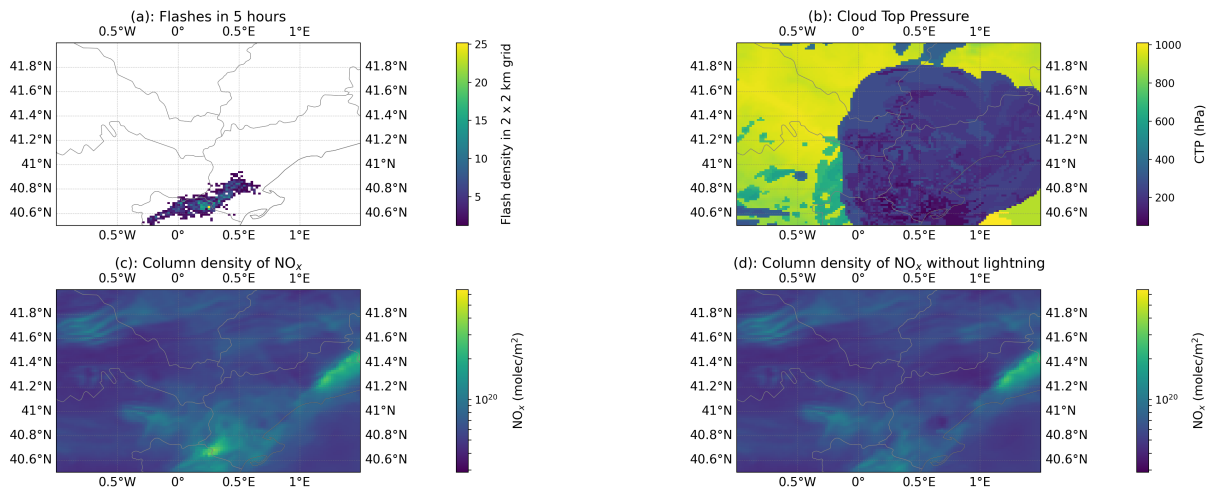

**Figure S49.** Simulation results for 4 May 2025 at 12:50 UTC, focused on the region of interest. (a): Assimilated lightning flashes between 07:50 and 12:50 UTC reported by MTG-LI. (b): Cloud Top Pressure (CTP). (c): Vertical Column Density of  $\text{NO}_x$ . (d): Vertical column density of  $\text{NO}_x$  in the simulation without fresh  $\text{LNO}_x$ , i.e., with  $\text{LNO}_x$  deactivated after 07:00 UTC.

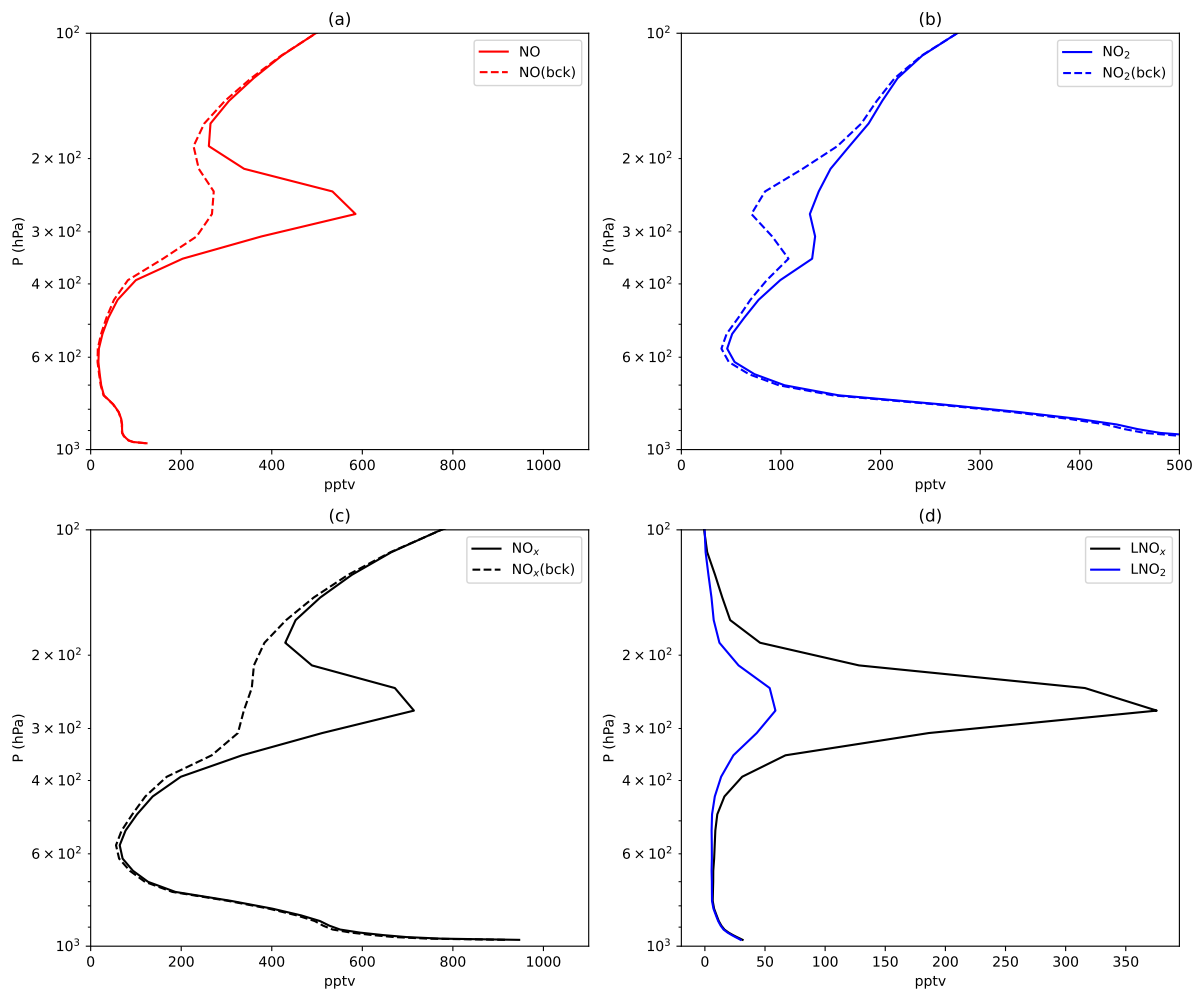

**Figure S50.** Vertical mixing ratio profiles of NO (a), NO<sub>2</sub> (b), NO<sub>x</sub> (c), LNO<sub>x</sub> and LNO<sub>2</sub> (d) extracted from WRF-CHEM simulations with (solid lines) and without (dashed lines) fresh LNO<sub>x</sub> on 4 May 2025 at 12:50 UTC (close to the TROPOMI overpass (background: bck)).

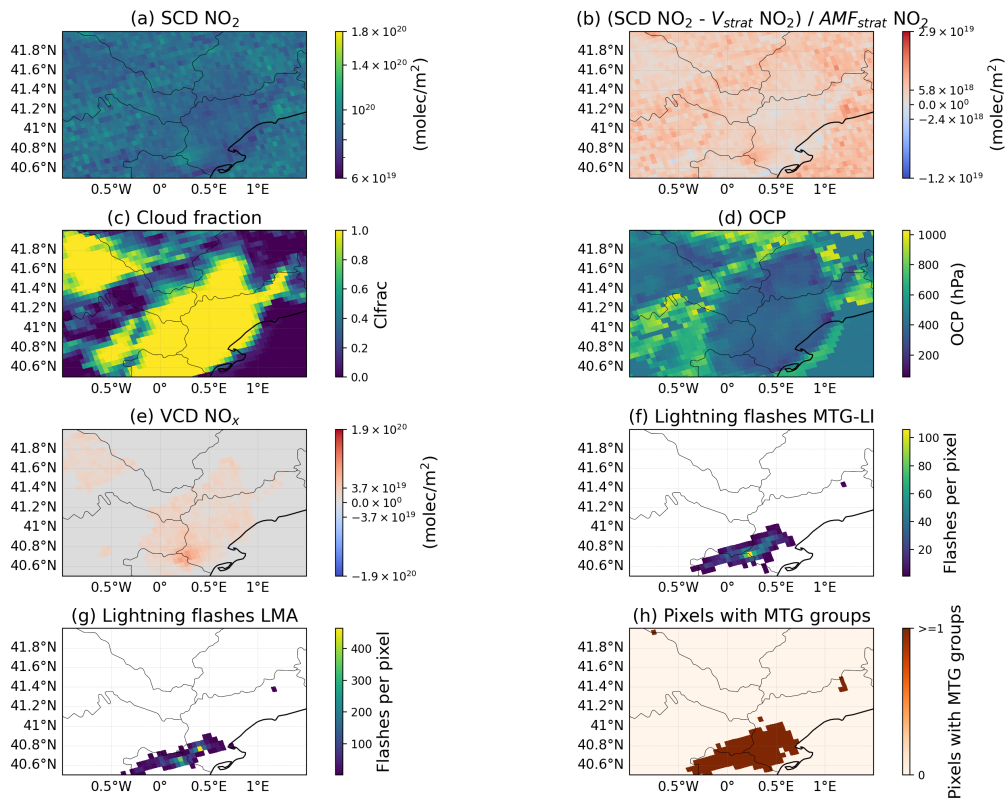

**Figure S51.** TROP-DLR product of orbit 39159, MTG-LI and LMA lightning data for the case 4 May 2025. (a): Slant Column Density (SCD) of NO<sub>2</sub> provided by the TROP-DLR NO<sub>2</sub> research product. (b): SCD NO<sub>2</sub> minus the stratospheric vertical column density and divided to the stratospheric air mass factor of NO<sub>2</sub> obtained from the TROP-DLR NO<sub>2</sub> research product. (c) and (d): Cloud Fraction (CF) and Optical Centroid Pressure (OCP) from the TROP-DLR NO<sub>2</sub> research product, respectively. (e): VCD of NO<sub>x</sub> ( $V_{tropNOx}$ ) over pixels satisfying the DCC. (f) and (g): Lightning flashes during the 5 h period per TROPOMI pixel before the TROPOMI overpass reported by MTG-LI and the LMA, respectively. (h): TROPOMI pixels containing at least one lightning group detected by MTG-LI.

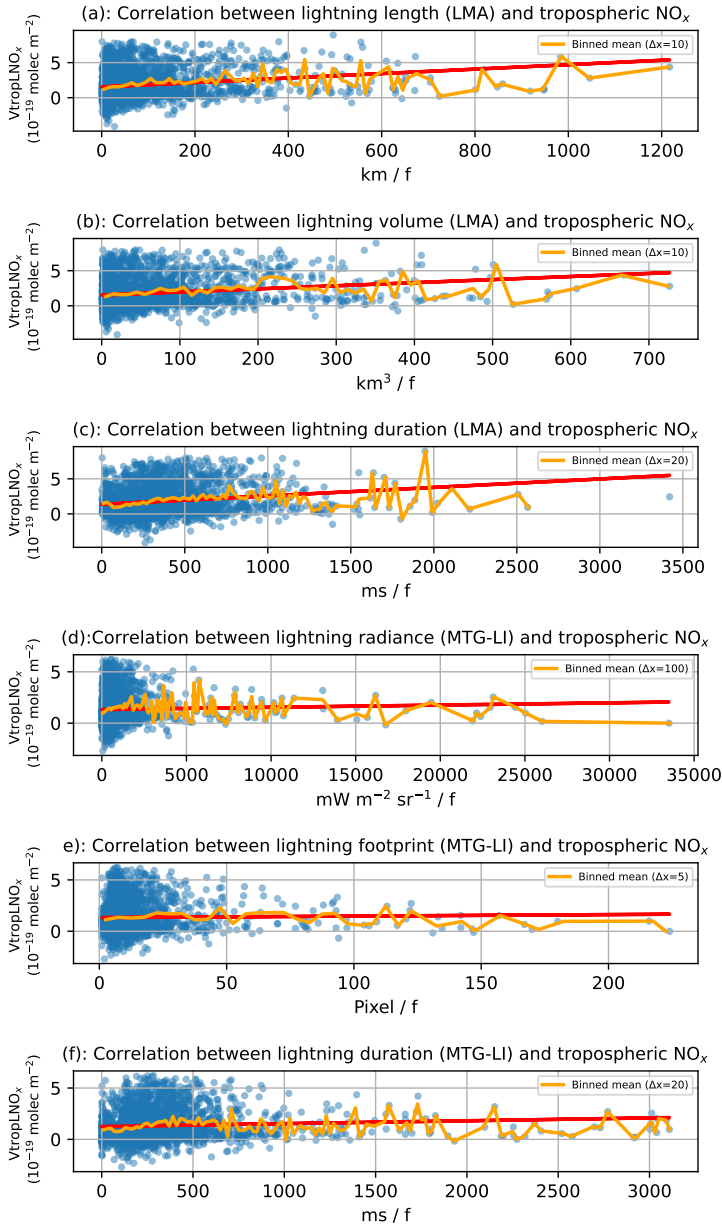

**Figure S52.** Pixel-based  $V_{tropLNOx}$  versus average flash channel length (a), average flash volume (b), average flash duration from the LMA (c), average flash footprint (d), average radiance (e) and average flash duration from MTG-LI (f), computed across all pixels included in the 18 analyzed dates. Only pixels with values of  $V_{tropLNOx}$  between the 5<sup>th</sup> and the 95<sup>th</sup> percentiles are included. The red lines correspond to linear fits of the plotted data, while the orange lines represent binned data obtained by calculating moving averages with a window interval  $\Delta x$ , as indicated in each panel.

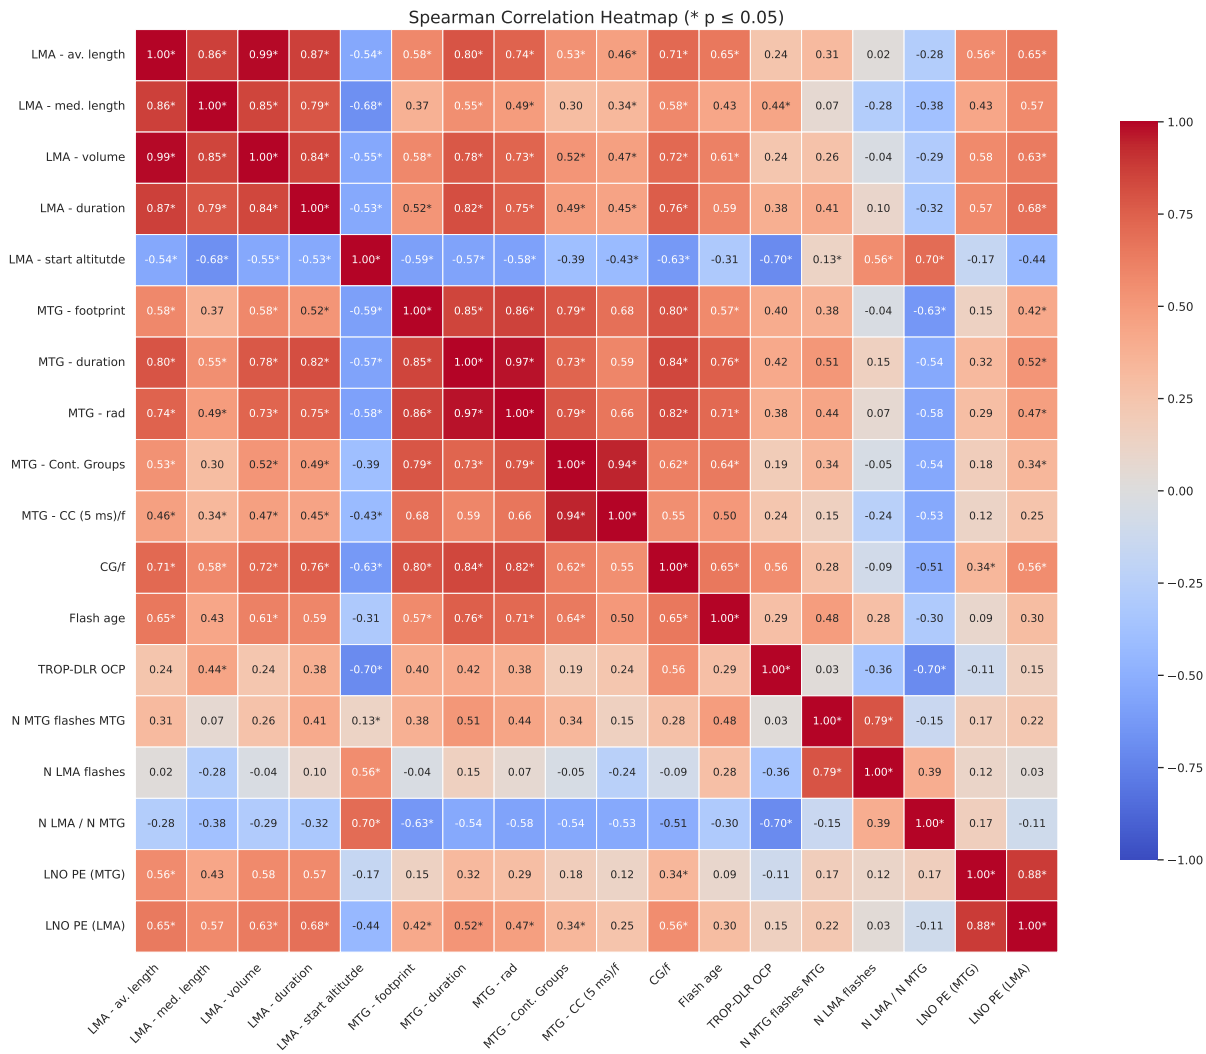

**Figure S53.** Spearman correlation heatmap of the most important lightning characteristics and LNO<sub>x</sub> PE estimates. These results are based on calculations with  $\tau = 3$  h.

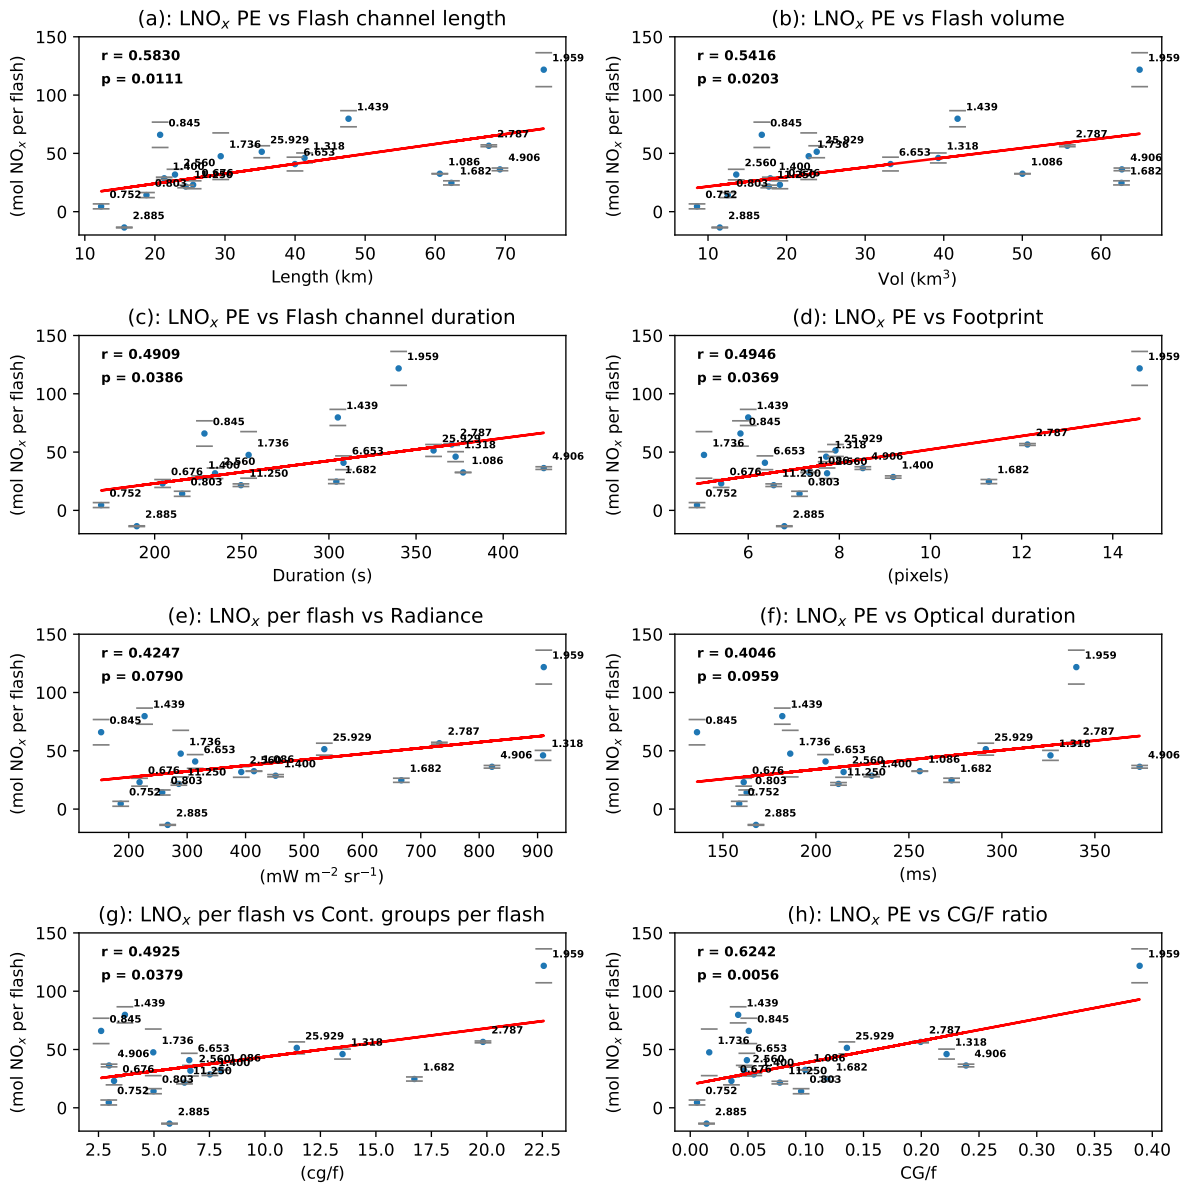

**Figure S54.** Pearson correlation between the LNO<sub>x</sub> PE and the most important lightning characteristics included in this study. The average LNO<sub>x</sub> PE (blue points) is obtained as the average between the LNO<sub>x</sub> PE estimates by using both MTG-LI and the LMA for each analyzed case, while each pair of grey bars are the values of the LNO<sub>x</sub> PE estimates by using MTG-LI and the LMA separately. The numbers close to the points represent the total number of flashes reported by MTG-LI in units of kfl. The flash channel length, the flash volume and the flash durations in panels (a), (b) and (c) are the average values calculated from LMA measurements. The footprint, the radiance, the flash durations and the total number of contiguous groups per flash in panels (d), (e), (f) and (g) are the average values calculated from MTG-LI measurements. The average ratio of CG to total flashes in panel (h) is obtained from LLS-SMC and LMA lightning measurements. Each subplot includes the Pearson correlation coefficient  $r$  and its corresponding  $p$ -value, as well as a linear fitting of the blue points (red line). These results are based on calculations with  $\tau = 3$  h.

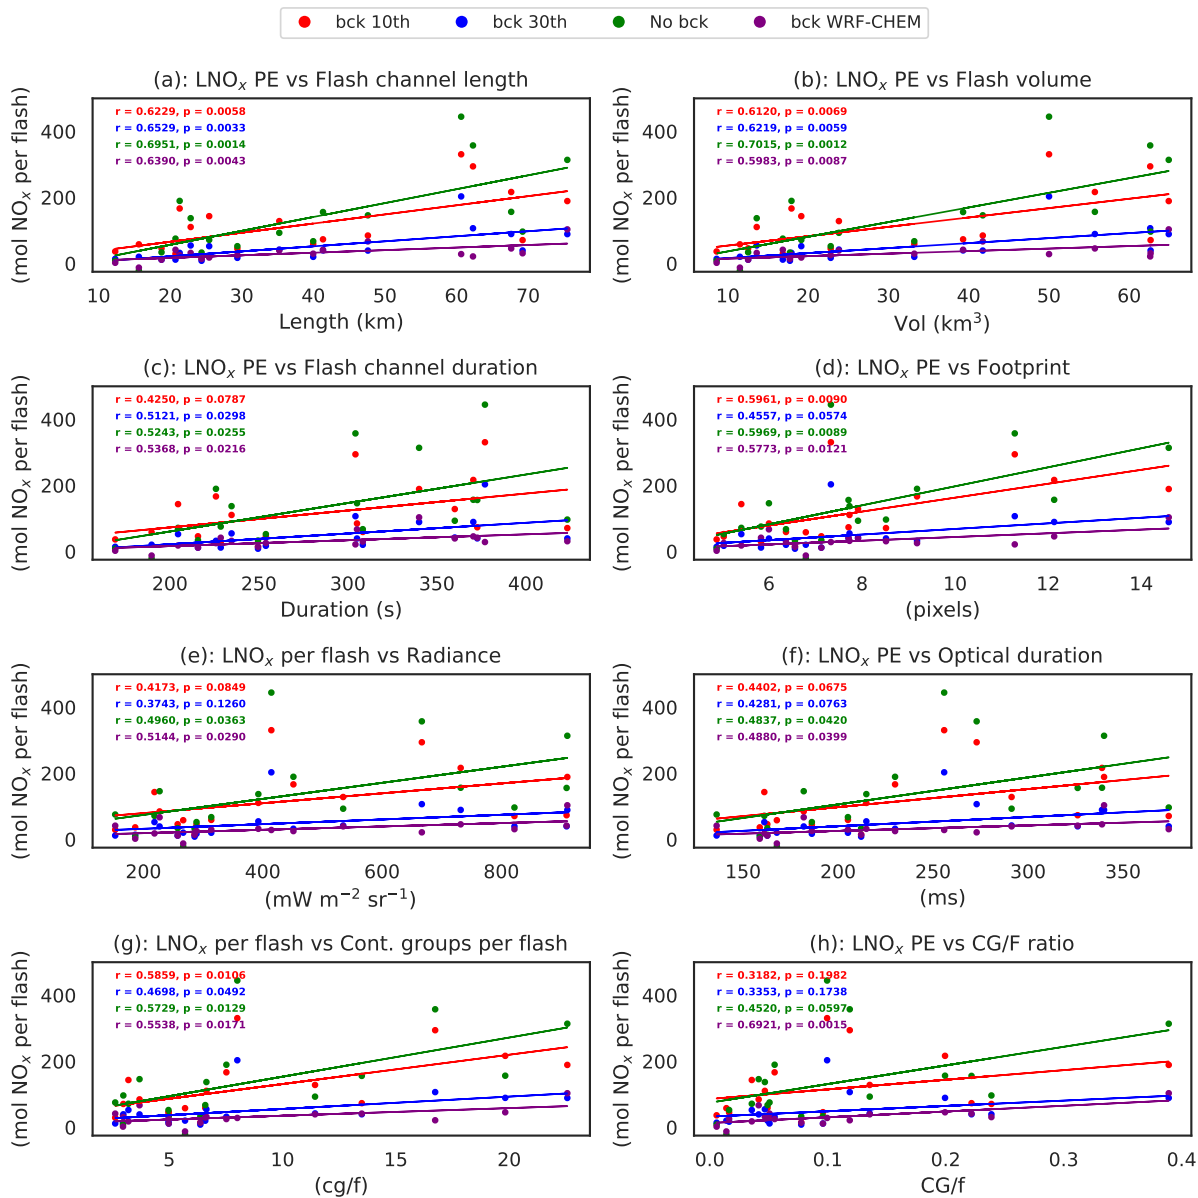

**Figure S55.** Analysis of the influence of the background-NO<sub>x</sub> estimate in the obtained relationships. This plot shows the Pearson correlation between the LNO<sub>x</sub> PE and the most important lightning characteristics included in this study by assuming that the background-NO<sub>x</sub> is the 10th percentile (red), the 30th percentile (blue) of the VCD tropospheric NO<sub>x</sub> over non-flashing pixels, without subtracting the background-NO<sub>x</sub> (green), and using the WRF-Chem simulations (purple) to calculate the background-NO<sub>x</sub>. The LNO<sub>x</sub> PE is obtained as the LNO<sub>x</sub> PE estimates by using the LMA for each analyzed case. The flash channel length, the flash volume and the flash durations in panels (a), (b) and (c) are the average values calculated from LMA measurements. The footprint, the radiance, the flash durations and the total number of contiguous groups per flash in panels (d), (e), (f) and (g) are the average values calculated from MTG-LI measurements. The average ratio of CG to total flashes in panel (h) is obtained from LLS-SMC and LMA lightning measurements. Each subplot includes the Pearson correlation coefficient *r* and its corresponding *p*-value, as well as a linear fitting of the blue points (solid lines). These results are based on calculations with  $\tau = 5$  h.

15 *Competing interests.* Authors declare no competing interests.
